# Supplementary material for: Construction of a novel immune-related lncRNA signature and its potential to predict the immune status of patients with hepatocellular carcinoma
Source: Springer Nature journal article supplement (doi:10.1186/s12885-021-09059-x), 2021-12-01
Supplement: MOESM2 [file 19968004]

| gene      | conMean  | treatMean | logFC    | pValue   | fdr      |
|-----------|----------|-----------|----------|----------|----------|
| AC093673  | 3.163426 | 7.33399   | 1.21311  | 2.10E-11 | 4.58E-11 |
| AC092535  | 1.036945 | 6.471465  | 2.641754 | 7.00E-19 | 3.81E-18 |
| AC099850  | 0.183166 | 2.081554  | 3.506435 | 3.81E-18 | 1.81E-17 |
| U91328.1  | 0.472912 | 1.228562  | 1.377327 | 2.13E-14 | 6.34E-14 |
| LINC0010f | 0.37402  | 1.6431    | 2.135232 | 1.20E-15 | 4.04E-15 |
| PPP1R14B  | 0.292719 | 1.214102  | 2.0523   | 1.39E-14 | 4.20E-14 |
| SNHG6     | 11.70091 | 45.53758  | 1.960437 | 3.16E-21 | 3.25E-20 |
| AC109322  | 0.245663 | 1.545494  | 2.653313 | 1.87E-27 | 3.47E-25 |
| FAM99A    | 13.79846 | 5.52311   | -1.32095 | 7.91E-14 | 2.14E-13 |
| AL359921. | 0.474474 | 1.734024  | 1.869724 | 1.10E-20 | 8.76E-20 |
| AC007566  | 0.222305 | 0.549459  | 1.305468 | 4.23E-09 | 7.41E-09 |
| AC005840  | 0.281507 | 0.568707  | 1.014511 | 1.34E-08 | 2.27E-08 |
| COA6-AS1  | 1.036828 | 3.322924  | 1.680276 | 7.34E-18 | 3.35E-17 |
| AC007099  | 0.013203 | 0.612756  | 5.536428 | 1.02E-07 | 1.59E-07 |
| LINC0113f | 0.226353 | 1.055284  | 2.220986 | 5.96E-23 | 9.19E-22 |
| TYMSOS    | 0.779702 | 2.927928  | 1.908885 | 3.63E-14 | 1.05E-13 |
| AC010735  | 0.395278 | 1.056607  | 1.4185   | 1.02E-09 | 1.91E-09 |
| AC084018  | 0.231808 | 1.102952  | 2.250367 | 9.36E-17 | 3.67E-16 |
| UBR5-AS1  | 0.675682 | 1.83851   | 1.444121 | 1.57E-23 | 2.99E-22 |
| AC124798  | 0.181986 | 0.61745   | 1.762497 | 0.025528 | 0.028322 |
| SH3BP5-A  | 0.322053 | 0.662067  | 1.039677 | 1.34E-09 | 2.47E-09 |
| AL021807. | 0.07637  | 0.629068  | 3.042135 | 1.32E-16 | 5.08E-16 |
| THUMPD3   | 0.417553 | 1.434058  | 1.780072 | 6.85E-25 | 2.30E-23 |
| AC010531  | 0.378412 | 0.970835  | 1.359269 | 1.94E-06 | 2.81E-06 |
| AC016405  | 0.210645 | 0.929251  | 2.141253 | 3.03E-12 | 7.11E-12 |
| LINC0229f | 0.129878 | 0.703709  | 2.437816 | 8.98E-05 | 0.000117 |
| AC012615  | 0.456284 | 1.737743  | 1.929209 | 1.10E-23 | 2.32E-22 |
| AC023043  | 0.252395 | 0.890745  | 1.81933  | 6.65E-13 | 1.67E-12 |
| AL109615. | 0.045131 | 0.733589  | 4.022782 | 1.82E-11 | 4.01E-11 |
| SNHG19    | 10.30831 | 26.1105   | 1.340823 | 1.57E-06 | 2.29E-06 |
| AP001505. | 1.278712 | 3.855314  | 1.592157 | 1.77E-12 | 4.27E-12 |
| AL365203. | 0.682079 | 2.228084  | 1.707792 | 3.48E-15 | 1.12E-14 |
| MAPKAPK   | 1.350742 | 3.967567  | 1.554503 | 8.83E-27 | 9.34E-25 |
| AC007292  | 0.289337 | 1.002109  | 1.792216 | 4.50E-19 | 2.60E-18 |
| TNFRSF14  | 0.383856 | 1.040593  | 1.438768 | 1.70E-06 | 2.47E-06 |
| AC005899  | 0.189086 | 0.599536  | 1.664806 | 4.92E-10 | 9.45E-10 |
| AL391422. | 1.193266 | 2.507501  | 1.071334 | 1.53E-11 | 3.41E-11 |
| AL050341. | 0.901121 | 2.179595  | 1.274267 | 7.24E-16 | 2.54E-15 |
| AC064836  | 0.488655 | 1.086648  | 1.152998 | 7.08E-10 | 1.34E-09 |
| AL355802. | 0.122382 | 0.583838  | 2.254182 | 5.07E-20 | 3.64E-19 |
| ZFAS1     | 6.45919  | 19.53775  | 1.596839 | 1.38E-17 | 5.96E-17 |
| MUC12-A'  | 0.061443 | 0.620857  | 3.336938 | 0.000339 | 0.000422 |
| AC091729  | 1.120439 | 2.851027  | 1.347418 | 9.19E-18 | 4.10E-17 |
| FLVCR1-D  | 0.231485 | 1.111709  | 2.263791 | 2.61E-19 | 1.61E-18 |
| POLR2J4   | 0.618527 | 1.265251  | 1.032515 | 1.01E-16 | 3.92E-16 |
| SLC25A25  | 0.693352 | 1.842662  | 1.410132 | 8.60E-10 | 1.62E-09 |
| AC073611  | 0.204749 | 0.733007  | 1.839972 | 1.15E-18 | 5.94E-18 |
| ASB16-AS  | 0.835192 | 2.624523  | 1.651876 | 2.86E-25 | 1.25E-23 |
| AL031673. | 0.495194 | 1.843383  | 1.896291 | 2.06E-19 | 1.30E-18 |
| AC008764  | 0.420982 | 1.184437  | 1.492371 | 8.15E-11 | 1.68E-10 |
| BX322562. | 0.793129 | 2.019644  | 1.348473 | 0.016542 | 0.018631 |
| AL358472. | 0.389859 | 0.892932  | 1.195597 | 4.37E-16 | 1.61E-15 |
| AC008736  | 0.374566 | 1.090306  | 1.541439 | 2.29E-12 | 5.48E-12 |
| TRIM52-A  | 2.198441 | 4.953459  | 1.171956 | 1.09E-15 | 3.71E-15 |
| AC016394  | 0.13097  | 0.719759  | 2.45828  | 1.09E-25 | 5.35E-24 |
| LINC0150f | 0.556853 | 1.431528  | 1.362188 | 0.002721 | 0.003186 |
| AC009779  | 1.793328 | 3.783868  | 1.077222 | 1.42E-16 | 5.45E-16 |

|           |          |          |          |          |          |
|-----------|----------|----------|----------|----------|----------|
| PXN-AS1   | 0.720148 | 1.894678 | 1.395587 | 4.65E-21 | 4.59E-20 |
| PRR34-AS  | 0.935418 | 3.428075 | 1.873715 | 2.02E-13 | 5.28E-13 |
| PVT1      | 0.118649 | 0.929567 | 2.969859 | 2.90E-20 | 2.15E-19 |
| SNHG25    | 0.651616 | 5.018619 | 2.945195 | 1.99E-23 | 3.60E-22 |
| AC004687  | 0.196521 | 0.638455 | 1.699901 | 1.53E-06 | 2.25E-06 |
| ZFPM2-AS  | 0.053865 | 1.493454 | 4.793167 | 1.20E-08 | 2.05E-08 |
| AC104825  | 0.409677 | 0.974514 | 1.250195 | 1.07E-10 | 2.19E-10 |
| AC009407  | 3.991088 | 10.44651 | 1.388166 | 3.63E-09 | 6.39E-09 |
| AC103691  | 0.443405 | 0.929335 | 1.067575 | 8.70E-08 | 1.37E-07 |
| AL390198  | 0.425944 | 1.27319  | 1.579712 | 0.000142 | 0.000181 |
| PITPNA-A  | 1.65081  | 4.433619 | 1.425311 | 6.23E-16 | 2.23E-15 |
| LINC00294 | 0.862224 | 1.874373 | 1.120273 | 2.84E-18 | 1.38E-17 |
| AL162582  | 0.133943 | 1.827624 | 3.770279 | 1.23E-09 | 2.28E-09 |
| AC010280  | 3.545021 | 0.881215 | -2.00823 | 3.36E-21 | 3.41E-20 |
| AL160006  | 0.215474 | 0.817242 | 1.923247 | 7.63E-22 | 8.96E-21 |
| AC010969  | 0.527831 | 1.193937 | 1.177578 | 1.85E-17 | 7.84E-17 |
| AC010542  | 0.23622  | 0.873335 | 1.886403 | 1.17E-18 | 6.03E-18 |
| AL021328  | 1.38585  | 0.473786 | -1.54846 | 1.47E-16 | 5.60E-16 |
| AC009283  | 1.814618 | 4.569689 | 1.332431 | 7.56E-19 | 4.08E-18 |
| AC244090  | 3.362677 | 9.028119 | 1.424815 | 1.98E-17 | 8.21E-17 |
| AC008267  | 2.82838  | 6.126457 | 1.115077 | 6.67E-11 | 1.40E-10 |
| AC147067  | 0.332911 | 0.811313 | 1.285123 | 1.07E-05 | 1.48E-05 |
| AC009237  | 1.338443 | 3.017227 | 1.172668 | 1.64E-15 | 5.38E-15 |
| LINC01770 | 0.756309 | 1.989617 | 1.395443 | 2.32E-07 | 3.52E-07 |
| AC002456  | 0.52978  | 1.384336 | 1.385728 | 8.84E-05 | 0.000115 |
| AC136475  | 0.532915 | 1.350711 | 1.341741 | 7.27E-13 | 1.82E-12 |
| AC138696  | 0.58664  | 2.541744 | 2.11527  | 2.28E-20 | 1.72E-19 |
| AC008443  | 0.643931 | 1.837001 | 1.512374 | 4.13E-10 | 7.98E-10 |
| SERTAD4-  | 0.052423 | 0.667172 | 3.66979  | 5.39E-16 | 1.94E-15 |
| AC132872  | 0.248568 | 0.632864 | 1.348257 | 1.93E-09 | 3.48E-09 |
| AC084036  | 1.128049 | 3.565437 | 1.660249 | 4.51E-16 | 1.65E-15 |
| CTBP1-DT  | 0.738001 | 1.797603 | 1.28438  | 1.00E-21 | 1.16E-20 |
| AL162413  | 0.01103  | 4.245629 | 8.588431 | 3.05E-09 | 5.42E-09 |
| AL121944  | 1.261878 | 2.527907 | 1.002371 | 6.35E-11 | 1.35E-10 |
| AC007448  | 0.264069 | 0.772098 | 1.547867 | 1.03E-09 | 1.94E-09 |
| BX537318  | 0.477849 | 1.423758 | 1.575077 | 6.92E-21 | 6.17E-20 |
| ARRDC1-7  | 1.527505 | 3.569038 | 1.224358 | 8.45E-24 | 1.84E-22 |
| LINC01426 | 0.074323 | 0.835773 | 3.491224 | 8.19E-12 | 1.87E-11 |
| AL445524  | 1.830088 | 12.66058 | 2.790358 | 8.48E-26 | 4.82E-24 |
| DLG5-AS1  | 0.179582 | 1.385736 | 2.947938 | 1.56E-23 | 2.99E-22 |
| DLGAP1-7  | 1.271828 | 3.068002 | 1.270396 | 2.09E-10 | 4.13E-10 |
| AL049840  | 2.057305 | 5.375175 | 1.385556 | 1.63E-19 | 1.07E-18 |
| CYTOR     | 0.722748 | 4.130732 | 2.514832 | 8.43E-21 | 7.16E-20 |
| AC011445  | 0.303189 | 2.805598 | 3.210017 | 8.52E-21 | 7.16E-20 |
| AC110285  | 0.228376 | 1.539482 | 2.752965 | 3.56E-19 | 2.16E-18 |
| AC083880  | 0.202429 | 0.676264 | 1.740175 | 1.55E-14 | 4.67E-14 |
| MINCR     | 0.769633 | 3.339484 | 2.117382 | 5.23E-21 | 4.84E-20 |
| AL023803  | 0.581269 | 1.525726 | 1.392218 | 2.43E-05 | 3.28E-05 |
| AL928654  | 0.307821 | 0.91663  | 1.574249 | 9.11E-12 | 2.07E-11 |
| LINC01315 | 0.163606 | 0.665645 | 2.024525 | 4.72E-13 | 1.20E-12 |
| AP000424  | 0.121326 | 0.591554 | 2.285618 | 0.001875 | 0.002199 |
| AC022150  | 0.203157 | 0.547938 | 1.431416 | 0.000317 | 0.000395 |
| CHKB-DT   | 0.521489 | 1.286361 | 1.302586 | 2.63E-16 | 9.88E-16 |
| AC006504  | 0.201836 | 0.729382 | 1.853491 | 7.10E-16 | 2.51E-15 |
| AC006213  | 0.253245 | 0.839264 | 1.728594 | 3.29E-10 | 6.43E-10 |
| PRKAR1B-  | 0.312737 | 0.842778 | 1.430202 | 1.88E-08 | 3.14E-08 |
| AC127024  | 0.187299 | 0.878004 | 2.228885 | 9.47E-21 | 7.62E-20 |
| AC026471  | 0.700185 | 1.612986 | 1.203926 | 3.73E-14 | 1.07E-13 |

|           |          |          |          |          |          |
|-----------|----------|----------|----------|----------|----------|
| MIR210HC  | 0.439851 | 1.419384 | 1.69018  | 0.000416 | 0.000512 |
| AC009065  | 0.518518 | 1.219769 | 1.234141 | 5.97E-15 | 1.87E-14 |
| AL359643  | 0.336933 | 0.836039 | 1.311108 | 3.18E-14 | 9.23E-14 |
| AC136475  | 0.440161 | 1.324741 | 1.589607 | 0.011424 | 0.013046 |
| AL118516  | 1.739653 | 3.558272 | 1.032377 | 2.12E-10 | 4.19E-10 |
| AL158071  | 0.203916 | 0.619443 | 1.602999 | 3.73E-10 | 7.22E-10 |
| AL022328  | 0.317449 | 0.790558 | 1.316347 | 1.97E-11 | 4.32E-11 |
| AFAP1-AS  | 0.005129 | 1.323426 | 8.011325 | 1.66E-13 | 4.40E-13 |
| SNHG11    | 1.670991 | 5.161074 | 1.626967 | 3.39E-23 | 5.70E-22 |
| LINC00205 | 0.289346 | 1.405556 | 2.280276 | 1.03E-21 | 1.17E-20 |
| AC010331  | 0.119088 | 0.606362 | 2.348153 | 7.63E-22 | 8.96E-21 |
| NCK1-DT   | 0.636228 | 1.416334 | 1.154545 | 2.25E-19 | 1.41E-18 |
| AC011477  | 0.378295 | 0.986702 | 1.383104 | 2.25E-07 | 3.42E-07 |
| AL354892  | 1.056558 | 2.284709 | 1.112638 | 8.24E-08 | 1.30E-07 |
| AC091271  | 0.670871 | 1.479532 | 1.141033 | 2.30E-08 | 3.79E-08 |
| AC012467  | 0.571004 | 1.269549 | 1.152742 | 5.50E-20 | 3.91E-19 |
| AP000240  | 0.213293 | 0.639438 | 1.583968 | 1.17E-09 | 2.17E-09 |
| Z95115.1  | 0.339388 | 1.009343 | 1.572409 | 5.82E-14 | 1.61E-13 |
| SNHG30    | 1.354942 | 3.944495 | 1.541609 | 8.44E-19 | 4.46E-18 |
| GIHCG     | 0.38911  | 1.925016 | 2.306622 | 3.99E-24 | 9.83E-23 |
| TBX2-AS1  | 0.171174 | 0.777199 | 2.182823 | 9.24E-12 | 2.08E-11 |
| AC104958  | 3.574543 | 12.10274 | 1.759503 | 3.24E-14 | 9.37E-14 |
| AC103706  | 0.254451 | 1.342626 | 2.399596 | 7.37E-21 | 6.42E-20 |
| AL132989  | 0.295301 | 0.66163  | 1.163838 | 1.61E-07 | 2.47E-07 |
| AC005586  | 0.291505 | 0.867054 | 1.572601 | 8.31E-13 | 2.06E-12 |
| ST7-AS1   | 0.206386 | 0.545946 | 1.403417 | 9.95E-11 | 2.05E-10 |
| AC012409  | 1.705277 | 0.83098  | -1.03712 | 2.68E-12 | 6.37E-12 |
| AC104113  | 0.486284 | 1.070232 | 1.138052 | 9.24E-12 | 2.08E-11 |
| AC015982  | 0.464077 | 0.946198 | 1.027776 | 1.55E-10 | 3.11E-10 |
| RPARP-AS  | 0.721191 | 1.489844 | 1.046709 | 4.39E-14 | 1.25E-13 |
| CCDC18-1  | 0.248727 | 1.024184 | 2.041839 | 6.26E-23 | 9.45E-22 |
| AC007114  | 1.295318 | 2.730659 | 1.075942 | 6.19E-11 | 1.32E-10 |
| AC015912  | 0.368842 | 1.482856 | 2.007305 | 7.30E-11 | 1.52E-10 |
| CAMTA1-1  | 0.242566 | 0.593918 | 1.291887 | 1.16E-07 | 1.81E-07 |
| AC026369  | 0.198162 | 0.548709 | 1.469362 | 1.89E-13 | 4.97E-13 |
| TAT-AS1   | 0.427066 | 0.881869 | 1.046106 | 0.009454 | 0.010829 |
| AC092490  | 0.053888 | 0.711839 | 3.723513 | 9.73E-05 | 0.000127 |
| AP002748  | 0.545956 | 1.294132 | 1.245128 | 2.48E-14 | 7.29E-14 |
| SSTR5-AS  | 0.009849 | 1.461736 | 7.213482 | 0.000309 | 0.000387 |
| ITGB1-DT  | 0.566653 | 1.563889 | 1.464602 | 0.00106  | 0.001267 |
| MAP3K2-1  | 0.419095 | 1.008296 | 1.266572 | 1.30E-09 | 2.40E-09 |
| AL354733  | 0.26252  | 0.553279 | 1.07558  | 0.001074 | 0.001282 |
| ANKRD10   | 0.853368 | 2.269042 | 1.410844 | 1.66E-07 | 2.54E-07 |
| AC005696  | 0.36597  | 0.830937 | 1.183012 | 1.47E-08 | 2.46E-08 |
| AC008610  | 0.197255 | 1.030347 | 2.384993 | 9.02E-19 | 4.70E-18 |
| AC112491  | 0.980106 | 1.973378 | 1.009658 | 0.001643 | 0.001939 |
| AC008549  | 23.38095 | 11.31306 | -1.04734 | 3.88E-14 | 1.11E-13 |
| AC124016  | 0.256978 | 0.622836 | 1.27721  | 6.96E-07 | 1.04E-06 |
| AC074117  | 0.472669 | 1.294549 | 1.453547 | 4.76E-21 | 4.64E-20 |
| AC008771  | 1.045184 | 2.529414 | 1.275047 | 5.02E-19 | 2.88E-18 |
| NOP14-AS  | 0.508031 | 1.086813 | 1.097115 | 4.54E-21 | 4.54E-20 |
| GAS5      | 6.027653 | 33.72981 | 2.484356 | 3.75E-25 | 1.39E-23 |
| LINC01703 | 0.124767 | 1.046643 | 3.068464 | 2.05E-20 | 1.57E-19 |
| LINC00528 | 0.127875 | 0.637619 | 2.317958 | 2.50E-20 | 1.87E-19 |
| DANCR     | 4.42438  | 11.78659 | 1.413599 | 4.06E-09 | 7.13E-09 |
| AL355102  | 0.350582 | 2.513658 | 2.841965 | 2.42E-05 | 3.28E-05 |
| AL117336  | 0.237875 | 0.826471 | 1.796759 | 5.49E-19 | 3.08E-18 |
| ZNF529-A  | 0.294109 | 0.914214 | 1.63618  | 1.19E-20 | 9.40E-20 |

|           |          |          |          |          |          |
|-----------|----------|----------|----------|----------|----------|
| LINC01857 | 0.259608 | 0.534095 | 1.040763 | 0.000205 | 0.000261 |
| VPS13B-D  | 0.732605 | 2.321344 | 1.663853 | 4.04E-15 | 1.29E-14 |
| AC145207  | 0.195689 | 0.684148 | 1.805747 | 4.30E-19 | 2.53E-18 |
| AL035071  | 0.803633 | 1.998843 | 1.314556 | 6.45E-15 | 2.01E-14 |
| AC048341  | 0.215025 | 1.087921 | 2.338998 | 3.03E-21 | 3.20E-20 |
| AC026740  | 0.138208 | 1.35502  | 3.293399 | 2.29E-19 | 1.42E-18 |
| AL451165  | 2.105299 | 4.605082 | 1.129202 | 6.73E-12 | 1.54E-11 |
| LINC01004 | 0.201823 | 0.842962 | 2.062378 | 2.09E-22 | 2.76E-21 |
| AC084824  | 0.42867  | 1.024414 | 1.25686  | 1.66E-13 | 4.40E-13 |
| AC027644  | 1.313399 | 2.823769 | 1.104317 | 8.82E-08 | 1.39E-07 |
| LINC01093 | 30.82677 | 4.466404 | -2.787   | 2.29E-25 | 1.06E-23 |
| AC012146  | 0.325398 | 1.504259 | 2.208774 | 3.99E-20 | 2.90E-19 |
| AL161669  | 0.361577 | 1.433957 | 1.987625 | 5.16E-15 | 1.62E-14 |
| PANK2-AS  | 0.23517  | 0.654008 | 1.475604 | 4.43E-13 | 1.14E-12 |
| LINC02035 | 0.291287 | 0.618881 | 1.087221 | 1.71E-10 | 3.40E-10 |
| SNHG15    | 0.907477 | 1.884032 | 1.05389  | 8.83E-06 | 1.23E-05 |
| AC006042  | 0.156822 | 0.648316 | 2.047564 | 4.47E-09 | 7.80E-09 |
| AC060780  | 0.228525 | 0.809819 | 1.82525  | 2.87E-12 | 6.79E-12 |
| PARD3-AS  | 0.21016  | 0.590742 | 1.491039 | 1.97E-08 | 3.27E-08 |
| AC010547  | 2.315825 | 1.131974 | -1.03269 | 5.12E-24 | 1.18E-22 |
| C2-AS1    | 0.245822 | 0.628038 | 1.353239 | 6.06E-08 | 9.70E-08 |
| AC083843  | 0.297522 | 0.754353 | 1.342241 | 1.38E-08 | 2.31E-08 |
| AC120053  | 0.55038  | 1.628419 | 1.564972 | 6.09E-20 | 4.29E-19 |
| SNHG14    | 0.211369 | 0.637834 | 1.593418 | 0.006129 | 0.007054 |
| AC004540  | 1.749296 | 0.567111 | -1.62507 | 8.08E-20 | 5.53E-19 |
| AL121899  | 0.318121 | 2.390599 | 2.909724 | 1.11E-19 | 7.40E-19 |
| LINC02163 | 0.00121  | 1.021286 | 9.721556 | 1.64E-14 | 4.91E-14 |
| MYLK-AS1  | 0.097409 | 0.699674 | 2.844562 | 7.53E-27 | 9.34E-25 |
| AC115618  | 2.291425 | 4.702419 | 1.037158 | 5.94E-11 | 1.27E-10 |
| AP003352  | 0.373765 | 1.541082 | 2.043742 | 2.65E-23 | 4.56E-22 |
| DICER1-AS | 0.353131 | 0.754735 | 1.095769 | 1.27E-11 | 2.85E-11 |
| AC010326  | 1.238888 | 2.959211 | 1.256167 | 4.83E-17 | 1.96E-16 |
| SNHG29    | 18.16456 | 37.66017 | 1.051913 | 5.89E-08 | 9.48E-08 |
| AL391056  | 0.022611 | 0.671633 | 4.892558 | 1.40E-07 | 2.16E-07 |
| SREBF2-AS | 0.190006 | 0.929223 | 2.289977 | 2.58E-26 | 2.12E-24 |
| HSD11B1-  | 1.33292  | 3.547031 | 1.412022 | 0.000442 | 0.000541 |
| AC009022  | 0.334902 | 0.709271 | 1.082599 | 1.28E-10 | 2.59E-10 |
| HCG18     | 0.341767 | 0.924909 | 1.436299 | 2.01E-18 | 1.01E-17 |
| AC005332  | 1.737848 | 4.635553 | 1.41544  | 2.31E-18 | 1.14E-17 |
| SEMA3B-7  | 0.387422 | 1.398511 | 1.851916 | 2.63E-08 | 4.30E-08 |
| LINC01836 | 0.229212 | 0.878819 | 1.938882 | 0.004285 | 0.00497  |
| AL603839  | 0.272785 | 0.734063 | 1.428142 | 4.54E-09 | 7.91E-09 |
| MMP25-A   | 0.293517 | 0.729784 | 1.314025 | 3.40E-13 | 8.80E-13 |
| ZSCAN16-  | 3.443201 | 7.500916 | 1.123316 | 1.64E-12 | 3.98E-12 |
| AL133520  | 0.545992 | 1.25653  | 1.202494 | 0.000172 | 0.000219 |
| LINC01942 | 0.689695 | 1.450846 | 1.072865 | 2.74E-06 | 3.92E-06 |
| FAM111A-  | 0.273121 | 0.698282 | 1.35427  | 7.48E-17 | 2.98E-16 |
| NIFK-AS1  | 0.570199 | 1.264887 | 1.149471 | 3.89E-19 | 2.34E-18 |
| TMEM44-   | 2.565958 | 5.857021 | 1.19067  | 1.52E-12 | 3.73E-12 |
| AL031058  | 2.064092 | 4.936447 | 1.257966 | 3.36E-05 | 4.49E-05 |
| SNHG8     | 19.47856 | 40.22252 | 1.046116 | 2.53E-11 | 5.47E-11 |
| LINC01133 | 0.035456 | 0.881146 | 4.635298 | 0.044866 | 0.049259 |
| LINC01124 | 0.949325 | 3.414409 | 1.846662 | 2.77E-05 | 3.72E-05 |
| LINC00896 | 0.094482 | 0.652229 | 2.787265 | 7.72E-11 | 1.60E-10 |
| AC022784  | 0.246774 | 1.013012 | 2.037387 | 5.16E-07 | 7.76E-07 |
| AC016747  | 1.090886 | 2.809532 | 1.36483  | 8.60E-27 | 9.34E-25 |
| OTUD6B-7  | 1.62141  | 3.280372 | 1.016611 | 3.27E-18 | 1.57E-17 |
| HAGLR     | 0.011622 | 1.507579 | 7.01919  | 1.39E-27 | 3.43E-25 |

|           |          |          |          |          |          |
|-----------|----------|----------|----------|----------|----------|
| LINC01484 | 0.203283 | 0.553471 | 1.445023 | 1.46E-09 | 2.65E-09 |
| AL355353  | 1.183044 | 2.465145 | 1.059169 | 0.000336 | 0.000418 |
| AL359513  | 0.120214 | 0.575208 | 2.258478 | 4.98E-17 | 2.02E-16 |
| AL354836  | 0.4877   | 1.49624  | 1.617275 | 2.75E-15 | 8.89E-15 |
| AL441992  | 1.048315 | 3.2731   | 1.642585 | 1.85E-20 | 1.43E-19 |
| AC068506  | 0.12093  | 0.753633 | 2.639685 | 0.000148 | 0.000189 |
| SNHG20    | 0.361795 | 1.288704 | 1.832675 | 3.89E-24 | 9.83E-23 |
| LINC00886 | 0.43178  | 1.150869 | 1.414354 | 4.27E-05 | 5.68E-05 |
| FAM99B    | 3.77454  | 1.807266 | -1.06249 | 1.03E-14 | 3.16E-14 |
| AL360181  | 1.310395 | 2.764978 | 1.077266 | 0.027017 | 0.029929 |
| AC008735  | 0.370896 | 1.546773 | 2.060174 | 6.96E-16 | 2.47E-15 |
| AL365181  | 0.044872 | 0.872083 | 4.28057  | 2.53E-16 | 9.56E-16 |
| LENG8-AS  | 0.190327 | 0.882615 | 2.213303 | 1.87E-24 | 5.13E-23 |
| AC020915  | 0.384038 | 1.193137 | 1.63544  | 1.47E-22 | 1.98E-21 |
| AC009065  | 0.169893 | 0.610909 | 1.846331 | 5.94E-21 | 5.43E-20 |
| AC016773  | 0.060701 | 0.578569 | 3.252689 | 3.47E-25 | 1.39E-23 |
| ZNF687-A  | 0.677052 | 1.868192 | 1.464304 | 4.37E-15 | 1.39E-14 |
| AC092171  | 0.320882 | 3.082692 | 3.264074 | 1.15E-27 | 3.43E-25 |
| AL121832  | 0.779115 | 2.727053 | 1.807435 | 1.49E-19 | 9.83E-19 |
| AC024075  | 0.174663 | 0.549903 | 1.654606 | 5.20E-10 | 9.98E-10 |
| AC012510  | 0.287811 | 0.949093 | 1.721429 | 8.56E-17 | 3.37E-16 |
| LINC00942 | 0.00615  | 1.555603 | 7.982678 | 1.01E-08 | 1.73E-08 |
| AC099508  | 1.932979 | 0.547204 | -1.82067 | 4.34E-19 | 2.53E-18 |
| AP000593  | 0.02346  | 1.496655 | 5.995414 | 1.27E-10 | 2.58E-10 |
| LINC00685 | 0.125699 | 0.870312 | 2.791565 | 3.60E-23 | 5.79E-22 |
| AC012313  | 0.864041 | 1.757568 | 1.024408 | 9.24E-07 | 1.38E-06 |
| LINC00221 | 0.002712 | 1.10443  | 8.669661 | 1.59E-07 | 2.44E-07 |
| IDH1-AS1  | 0.466803 | 1.204681 | 1.367767 | 1.70E-09 | 3.08E-09 |
| AP000759  | 0.605085 | 1.53736  | 1.345246 | 3.18E-14 | 9.23E-14 |
| LINC02041 | 0.080913 | 1.092878 | 3.755614 | 0.002729 | 0.00319  |
| AC015849  | 0.184326 | 0.56545  | 1.617139 | 7.65E-10 | 1.45E-09 |
| MALAT1    | 2.157594 | 6.152177 | 1.511673 | 1.04E-15 | 3.56E-15 |
| AC111000  | 0.122345 | 1.127003 | 3.20347  | 1.78E-17 | 7.60E-17 |
| AC068473  | 0.419292 | 1.157338 | 1.464782 | 1.80E-18 | 9.12E-18 |
| AL391244  | 0.351646 | 1.049788 | 1.577903 | 1.31E-20 | 1.02E-19 |
| AC084824  | 0.330474 | 0.850634 | 1.364002 | 1.71E-15 | 5.58E-15 |
| DNAJC3-C  | 0.431365 | 1.022508 | 1.24513  | 7.99E-11 | 1.65E-10 |
| EIF3J-DT  | 0.46915  | 1.015648 | 1.11428  | 7.32E-16 | 2.55E-15 |
| AC009686  | 0.171282 | 0.670775 | 1.969452 | 7.12E-11 | 1.49E-10 |
| AC079305  | 0.147634 | 0.58304  | 1.981569 | 1.24E-07 | 1.92E-07 |
| AC004816  | 0.145398 | 0.996639 | 2.777066 | 1.32E-22 | 1.80E-21 |
| LINC00342 | 0.389269 | 1.131618 | 1.539549 | 2.17E-14 | 6.41E-14 |
| AC023906  | 0.10081  | 0.870858 | 3.110793 | 0.000286 | 0.000361 |
| LINC00623 | 0.739846 | 1.692711 | 1.194039 | 2.17E-11 | 4.72E-11 |
| AC010883  | 0.422618 | 1.25078  | 1.5654   | 6.47E-13 | 1.63E-12 |
| AL356234  | 0.05398  | 0.826058 | 3.93575  | 7.62E-14 | 2.08E-13 |
| AC132872  | 0.521036 | 1.942457 | 1.898427 | 1.87E-23 | 3.46E-22 |
| AC007773  | 0.13765  | 0.707799 | 2.362333 | 4.93E-18 | 2.31E-17 |
| LINC02241 | 0.000426 | 0.888621 | 11.02666 | 1.28E-12 | 3.15E-12 |
| LINC01480 | 0.049733 | 0.881198 | 4.147179 | 3.55E-08 | 5.80E-08 |
| AC005332  | 0.359772 | 1.790952 | 2.31557  | 1.06E-26 | 9.84E-25 |
| AL118558  | 0.591829 | 1.33673  | 1.175456 | 1.64E-12 | 3.98E-12 |
| CD2BP2-C  | 1.001605 | 2.272652 | 1.182063 | 7.14E-12 | 1.63E-11 |
| AC005920  | 0.45807  | 1.228889 | 1.423713 | 0.000375 | 0.000465 |
| LNCTAM3   | 0.319557 | 0.918125 | 1.522618 | 9.60E-15 | 2.96E-14 |
| AL161668  | 6.377865 | 2.54853  | -1.32341 | 4.74E-16 | 1.73E-15 |
| LINC02062 | 0.20721  | 0.548325 | 1.403935 | 1.58E-11 | 3.52E-11 |
| AC095057  | 0.171051 | 0.559146 | 1.708795 | 2.95E-12 | 6.95E-12 |

|           |          |          |          |          |          |
|-----------|----------|----------|----------|----------|----------|
| AC011700  | 0.23329  | 0.548133 | 1.232399 | 3.56E-06 | 5.03E-06 |
| AC023090  | 0.007746 | 0.626512 | 6.337672 | 7.54E-09 | 1.31E-08 |
| ELF3-AS1  | 0.433825 | 2.177377 | 2.327406 | 1.04E-19 | 6.98E-19 |
| AL355574. | 0.219373 | 0.91761  | 2.064496 | 6.62E-19 | 3.63E-18 |
| AC107375  | 0.162585 | 0.732007 | 2.170663 | 9.91E-26 | 5.24E-24 |
| AC010761  | 0.219843 | 0.749769 | 1.76997  | 8.80E-18 | 3.97E-17 |
| AC011468  | 0.290868 | 1.169254 | 2.007151 | 8.44E-19 | 4.46E-18 |
| AL365181. | 0.226268 | 4.241738 | 4.22855  | 7.58E-18 | 3.44E-17 |
| ASH1L-AS  | 0.294663 | 0.774384 | 1.393984 | 5.26E-18 | 2.45E-17 |
| AP000254. | 1.254763 | 2.521725 | 1.006996 | 6.47E-13 | 1.63E-12 |
| AL031186. | 0.123074 | 0.595767 | 2.275221 | 4.87E-21 | 4.68E-20 |
| AC068580  | 0.204722 | 0.892079 | 2.123503 | 2.97E-13 | 7.73E-13 |
| AC034231  | 0.254385 | 0.768437 | 1.594914 | 2.31E-15 | 7.51E-15 |
| MAFG-DT   | 0.119233 | 1.476454 | 3.630285 | 7.98E-25 | 2.57E-23 |
| AC002398  | 0.309954 | 0.894128 | 1.528426 | 4.96E-15 | 1.57E-14 |
| MIR4435-; | 0.372212 | 2.014476 | 2.436208 | 9.95E-23 | 1.42E-21 |
| PSORS1C3  | 0.144938 | 0.911937 | 2.653502 | 1.35E-09 | 2.48E-09 |
| AC013275  | 0.098836 | 0.983149 | 3.3143   | 1.05E-07 | 1.64E-07 |
| AC068888  | 0.742697 | 1.509609 | 1.023329 | 1.96E-10 | 3.89E-10 |
| ELFN1-AS  | 0.04566  | 0.910602 | 4.317824 | 0.005869 | 0.006775 |
| ARHGAP2   | 0.177379 | 0.584585 | 1.720578 | 8.63E-21 | 7.17E-20 |
| AC022424  | 0.008662 | 0.788276 | 6.507832 | 1.47E-07 | 2.27E-07 |
| AC015813  | 0.209155 | 0.796465 | 1.929041 | 6.08E-17 | 2.44E-16 |
| LINC0154  | 0.128305 | 2.128594 | 4.052255 | 0.00056  | 0.000681 |
| AC025265  | 0.154723 | 0.565949 | 1.870984 | 4.97E-12 | 1.15E-11 |
| RNASEH1-  | 1.306506 | 2.769461 | 1.083891 | 9.79E-16 | 3.38E-15 |
| AC019117  | 0.246056 | 0.899713 | 1.870478 | 0.000429 | 0.000527 |
| PTOV1-AS  | 0.473182 | 1.231985 | 1.380518 | 4.84E-23 | 7.62E-22 |
| LINC00847 | 2.098642 | 4.264081 | 1.022779 | 3.39E-16 | 1.26E-15 |
| AC004148  | 0.262708 | 0.790841 | 1.589929 | 1.07E-15 | 3.65E-15 |
| AL359504. | 0.175786 | 0.544795 | 1.631892 | 6.39E-14 | 1.76E-13 |
| AC018904  | 0.950887 | 2.41173  | 1.342723 | 4.94E-16 | 1.79E-15 |
| AC007405  | 0.903436 | 2.434416 | 1.430082 | 8.72E-15 | 2.70E-14 |
| AL035461. | 0.370123 | 2.059544 | 2.476249 | 6.52E-20 | 4.55E-19 |
| AC142472  | 0.218401 | 0.663329 | 1.602746 | 5.37E-19 | 3.03E-18 |
| AC020978  | 4.697383 | 2.171596 | -1.1131  | 1.64E-15 | 5.38E-15 |
| AC040977  | 1.058995 | 3.028163 | 1.515747 | 3.00E-18 | 1.45E-17 |
| AL645933. | 0.712656 | 1.56922  | 1.13877  | 1.98E-08 | 3.29E-08 |
| RUSC1-AS  | 0.286733 | 1.654775 | 2.528857 | 1.14E-24 | 3.38E-23 |
| LINC02604 | 0.686024 | 1.567989 | 1.192585 | 3.43E-13 | 8.85E-13 |
| AC087741  | 0.352441 | 1.30265  | 1.885998 | 1.72E-13 | 4.54E-13 |
| AC009005  | 0.189461 | 1.413915 | 2.899726 | 3.69E-20 | 2.70E-19 |
| AC015871  | 0.359205 | 0.808541 | 1.170513 | 5.86E-13 | 1.49E-12 |
| LINC00957 | 0.319173 | 0.731721 | 1.196957 | 3.95E-08 | 6.42E-08 |
| AFDN-DT   | 0.31699  | 0.691875 | 1.126076 | 1.38E-09 | 2.53E-09 |
| AL135999. | 0.165959 | 0.647764 | 1.964643 | 1.89E-17 | 7.92E-17 |
| TMPO-AS   | 0.223928 | 1.154242 | 2.365841 | 1.34E-23 | 2.75E-22 |
| AC016394  | 0.189738 | 0.83029  | 2.129609 | 8.24E-21 | 7.09E-20 |
| TAF1A-AS  | 0.747174 | 1.499026 | 1.004508 | 1.23E-09 | 2.28E-09 |
| AC024075  | 0.80442  | 2.408968 | 1.582394 | 4.93E-21 | 4.68E-20 |
| AC009275  | 0.087308 | 0.733148 | 3.069928 | 1.02E-08 | 1.74E-08 |
| LINC0023  | 0.10789  | 0.636681 | 2.561005 | 1.43E-05 | 1.96E-05 |
| KCNMB2-   | 0.017109 | 0.749221 | 5.452522 | 1.26E-14 | 3.84E-14 |
| BX284668. | 3.892017 | 8.167327 | 1.069346 | 1.26E-08 | 2.14E-08 |
| AC011477  | 0.542014 | 1.39663  | 1.365547 | 2.86E-09 | 5.10E-09 |
| AC078993  | 0.026049 | 0.834589 | 5.001779 | 3.55E-10 | 6.90E-10 |
| NEAT1     | 5.481795 | 12.6457  | 1.205927 | 9.87E-09 | 1.70E-08 |
| SCAT8     | 0.273798 | 1.038534 | 1.923365 | 3.09E-05 | 4.15E-05 |

|           |          |          |          |          |          |
|-----------|----------|----------|----------|----------|----------|
| AP003174. | 0.086242 | 0.559118 | 2.69669  | 1.90E-11 | 4.19E-11 |
| AL365330. | 0.376062 | 0.925295 | 1.298943 | 1.51E-11 | 3.39E-11 |
| AC007541  | 0.39944  | 1.043334 | 1.385149 | 1.04E-15 | 3.56E-15 |
| AC020765  | 0.257708 | 0.923857 | 1.841933 | 4.11E-19 | 2.44E-18 |
| LINC00665 | 0.119604 | 1.405468 | 3.554708 | 1.62E-10 | 3.23E-10 |
| LINC01534 | 0.326395 | 0.746582 | 1.193683 | 2.13E-12 | 5.12E-12 |
| LINC01767 | 17.83771 | 8.809328 | -1.01783 | 2.66E-12 | 6.34E-12 |
| AC016888  | 2.416702 | 6.058208 | 1.325851 | 2.70E-12 | 6.41E-12 |
| HCP5      | 3.080273 | 8.09691  | 1.394313 | 1.13E-09 | 2.11E-09 |
| AL031985. | 0.218939 | 0.7233   | 1.724069 | 8.18E-20 | 5.55E-19 |
| AL606489. | 0.055938 | 0.834341 | 3.898725 | 8.23E-24 | 1.84E-22 |
| SNHG3     | 0.633349 | 3.314609 | 2.387767 | 3.52E-23 | 5.78E-22 |
| HEIH      | 5.341754 | 12.86642 | 1.268225 | 2.07E-24 | 5.47E-23 |
| LMNTD2-1  | 0.195997 | 0.824573 | 2.072817 | 7.63E-14 | 2.08E-13 |
| AC068580  | 0.311359 | 1.017235 | 1.708003 | 3.09E-14 | 9.04E-14 |
| PRRT3-AS  | 0.442701 | 1.748381 | 1.981615 | 2.87E-10 | 5.64E-10 |
| AC005332  | 0.232729 | 0.563755 | 1.276415 | 1.78E-11 | 3.94E-11 |
| AP002360. | 1.214584 | 4.067104 | 1.743539 | 8.08E-19 | 4.33E-18 |
| SNHG10    | 0.455102 | 1.518934 | 1.738798 | 1.56E-23 | 2.99E-22 |
| AC087741  | 0.18484  | 0.716305 | 1.954298 | 6.13E-19 | 3.41E-18 |
| U62317.2  | 1.545934 | 3.76831  | 1.285439 | 5.74E-16 | 2.06E-15 |
| NRAV      | 0.820404 | 2.090722 | 1.349595 | 3.98E-19 | 2.37E-18 |
| MAG12-AS  | 1.564102 | 0.758725 | -1.04369 | 1.16E-13 | 3.10E-13 |
| LINC02826 | 0.01707  | 0.838233 | 5.617827 | 7.33E-05 | 9.62E-05 |
| SLC6A1-A  | 0.151585 | 0.554465 | 1.87097  | 4.88E-06 | 6.87E-06 |
| AC139530  | 0.504627 | 1.532106 | 1.602227 | 9.25E-21 | 7.52E-20 |
| AC106820  | 0.182074 | 0.936768 | 2.363168 | 6.44E-19 | 3.56E-18 |
| VPS9D1-A  | 0.293666 | 0.823905 | 1.488303 | 1.16E-06 | 1.71E-06 |
| AP001372. | 0.554063 | 1.199578 | 1.114406 | 1.22E-15 | 4.10E-15 |
| AL355488. | 0.159005 | 0.990814 | 2.639539 | 9.07E-25 | 2.80E-23 |
| AC055822  | 0.22162  | 0.704284 | 1.66807  | 4.86E-14 | 1.37E-13 |
| SNHG1     | 1.243861 | 6.041754 | 2.280142 | 4.47E-26 | 3.01E-24 |
| AC040970  | 0.106725 | 0.629852 | 2.561114 | 7.47E-06 | 1.04E-05 |
| ZNF793-A  | 0.1002   | 0.571155 | 2.510992 | 0.000598 | 0.000725 |
| MELTF-AS  | 0.112246 | 0.961025 | 3.097909 | 7.08E-21 | 6.24E-20 |
| AP000894. | 0.374369 | 1.259622 | 1.75046  | 3.26E-13 | 8.48E-13 |
| SNHG7     | 1.412275 | 6.609583 | 2.226538 | 1.87E-24 | 5.13E-23 |
| CRIM1-DT  | 0.851886 | 3.148073 | 1.885737 | 0.000112 | 0.000144 |
| WNT5A-A   | 0.191036 | 0.608341 | 1.671033 | 0.003879 | 0.004507 |
| AL392172. | 1.84866  | 5.774383 | 1.643187 | 2.30E-21 | 2.50E-20 |
| SNHG12    | 0.473602 | 1.811267 | 1.935252 | 7.10E-22 | 8.62E-21 |
| AC104794  | 1.431963 | 3.121834 | 1.124399 | 4.55E-14 | 1.29E-13 |
| AC027796  | 0.106294 | 0.583389 | 2.456399 | 1.25E-17 | 5.51E-17 |
| ZNF503-A  | 0.411787 | 1.040383 | 1.337146 | 1.67E-17 | 7.18E-17 |
| AC090587  | 0.486699 | 1.009292 | 1.052243 | 4.96E-08 | 8.01E-08 |
| PTOV1-AS  | 0.453243 | 1.55688  | 1.780301 | 2.66E-18 | 1.30E-17 |
| MHENCN    | 1.64299  | 4.408032 | 1.42381  | 4.83E-17 | 1.96E-16 |
| AC125257  | 1.260418 | 2.688782 | 1.093051 | 1.38E-21 | 1.53E-20 |
| AL353622. | 0.247943 | 0.804718 | 1.698475 | 1.13E-14 | 3.46E-14 |
| LINC00513 | 0.157961 | 0.647675 | 2.035702 | 5.61E-07 | 8.38E-07 |
| BAIAP2-D  | 1.719264 | 4.877977 | 1.504492 | 8.92E-19 | 4.68E-18 |
| AC092171  | 0.415698 | 1.573045 | 1.919952 | 1.35E-17 | 5.91E-17 |
| APTR      | 1.110512 | 2.650322 | 1.254943 | 1.32E-22 | 1.80E-21 |
| GPRC5D-1  | 0.401211 | 0.934751 | 1.220223 | 1.66E-19 | 1.07E-18 |
| PRANCR    | 0.415161 | 1.046368 | 1.333649 | 9.09E-18 | 4.08E-17 |
| AC023157  | 0.545236 | 1.186093 | 1.121264 | 1.01E-09 | 1.90E-09 |
| LINC02027 | 5.577541 | 1.867271 | -1.5787  | 1.67E-19 | 1.07E-18 |
| AC000123  | 0.433409 | 0.95974  | 1.146914 | 1.65E-12 | 4.00E-12 |

|           |          |          |          |          |          |
|-----------|----------|----------|----------|----------|----------|
| AC005586  | 0.251212 | 0.582299 | 1.212852 | 1.09E-06 | 1.62E-06 |
| ZNF213-A  | 0.499615 | 1.267142 | 1.342689 | 9.14E-21 | 7.52E-20 |
| AC009237  | 0.246232 | 0.665483 | 1.434382 | 5.71E-12 | 1.31E-11 |
| U62317.1  | 0.259178 | 0.800768 | 1.627444 | 1.35E-08 | 2.27E-08 |
| FOX2-A    | 0.225472 | 1.579585 | 2.808525 | 5.05E-21 | 4.73E-20 |
| C2CD4D-A  | 1.028418 | 4.638335 | 2.17318  | 5.25E-19 | 2.99E-18 |
| AC131009  | 0.4517   | 1.221894 | 1.435683 | 1.75E-12 | 4.23E-12 |
| AC026462  | 1.320374 | 3.73676  | 1.500841 | 5.91E-05 | 7.79E-05 |
| AC068987  | 0.268475 | 1.605063 | 2.57977  | 5.60E-14 | 1.57E-13 |
| AC090589  | 0.359482 | 0.774625 | 1.107579 | 5.67E-08 | 9.15E-08 |
| YTHDF3-A  | 0.868331 | 2.105716 | 1.277994 | 1.34E-10 | 2.70E-10 |
| AP003486  | 0.341558 | 0.827403 | 1.276461 | 1.61E-15 | 5.33E-15 |
| AC080129  | 0.121195 | 0.789454 | 2.703525 | 1.79E-17 | 7.61E-17 |
| AJ009632  | 0.319346 | 1.330368 | 2.058634 | 0.020947 | 0.023521 |
| AC074212  | 0.153294 | 0.633311 | 2.046613 | 7.80E-23 | 1.15E-21 |
| AP002807  | 0.172393 | 0.861442 | 2.321051 | 3.65E-18 | 1.74E-17 |
| AC132192  | 0.117529 | 0.973848 | 3.050686 | 4.78E-28 | 3.43E-25 |
| NRSN2-A   | 0.361432 | 0.952883 | 1.398574 | 4.25E-12 | 9.90E-12 |
| LINC01786 | 0.300857 | 0.910318 | 1.597294 | 8.38E-14 | 2.26E-13 |
| AC012313  | 0.609874 | 1.304765 | 1.097206 | 9.70E-17 | 3.78E-16 |
| GAPLINC   | 0.071529 | 0.893981 | 3.643653 | 4.51E-14 | 1.28E-13 |
| LINC01671 | 0.162633 | 0.682322 | 2.068836 | 0.021908 | 0.024526 |
| AL117379  | 0.126153 | 0.619514 | 2.295958 | 1.10E-21 | 1.24E-20 |
| BACE1-AS  | 0.560946 | 2.149493 | 1.938062 | 5.04E-25 | 1.78E-23 |
| LUCAT1    | 0.021123 | 0.578824 | 4.776251 | 1.12E-08 | 1.91E-08 |
| RAD51-AS  | 0.343281 | 1.056517 | 1.621855 | 7.47E-20 | 5.16E-19 |
| AC006026  | 0.2707   | 0.648452 | 1.260303 | 0.001284 | 0.001528 |
| AC090164  | 0.076786 | 0.727029 | 3.243102 | 7.20E-14 | 1.98E-13 |
| AL844908  | 0.221688 | 0.550804 | 1.313007 | 1.09E-07 | 1.71E-07 |
| AC079466  | 0.038081 | 4.695623 | 6.946087 | 1.47E-06 | 2.17E-06 |
| CR936218  | 0.312461 | 0.861487 | 1.463154 | 0.001408 | 0.001673 |
| AC007406  | 0.16021  | 1.189949 | 2.892865 | 1.98E-06 | 2.85E-06 |
| TMEM147   | 0.183058 | 0.685395 | 1.904638 | 3.38E-22 | 4.31E-21 |
| CEBPA-DT  | 1.43906  | 4.884097 | 1.762965 | 3.55E-15 | 1.14E-14 |
| AC021078  | 0.380296 | 0.829084 | 1.124397 | 9.11E-14 | 2.45E-13 |
| AL162595  | 0.249471 | 0.77042  | 1.626774 | 1.36E-17 | 5.93E-17 |
| AC005229  | 0.660627 | 1.681631 | 1.347953 | 1.86E-19 | 1.19E-18 |
| AC027307  | 2.892197 | 8.621631 | 1.575795 | 4.19E-24 | 1.00E-22 |
| MID1IP1-A | 0.322096 | 1.010146 | 1.649002 | 2.55E-09 | 4.56E-09 |
| AC008608  | 0.970355 | 2.129741 | 1.134093 | 1.73E-09 | 3.12E-09 |
| AC104534  | 0.124183 | 0.870038 | 2.80861  | 5.88E-11 | 1.26E-10 |
| AL139287  | 0.856955 | 2.656586 | 1.632282 | 2.35E-21 | 2.52E-20 |
| AC010973  | 0.110305 | 0.626642 | 2.506145 | 7.06E-26 | 4.35E-24 |
| AC022144  | 0.523767 | 1.218033 | 1.217555 | 0.000648 | 0.000785 |
| KMT2E-AS  | 2.387686 | 5.900016 | 1.305106 | 1.52E-13 | 4.04E-13 |
| AP006621  | 0.24696  | 1.609354 | 2.704131 | 1.54E-16 | 5.85E-16 |
| AC005261  | 1.477345 | 2.973788 | 1.009295 | 9.39E-18 | 4.16E-17 |
| ZEB1-AS1  | 0.274888 | 0.805408 | 1.550878 | 3.63E-22 | 4.56E-21 |
| RAB30-DT  | 1.130121 | 2.478681 | 1.133095 | 2.14E-18 | 1.07E-17 |
| AC007038  | 0.177519 | 0.604213 | 1.767087 | 3.11E-19 | 1.90E-18 |
| AC005261  | 1.635385 | 3.93295  | 1.265981 | 2.65E-23 | 4.56E-22 |
| MIR4458H  | 0.66621  | 1.560526 | 1.227984 | 1.95E-09 | 3.50E-09 |
| AC006449  | 0.636535 | 1.282471 | 1.010615 | 1.33E-09 | 2.45E-09 |
| AL390728  | 0.99226  | 3.999798 | 2.011137 | 1.78E-18 | 9.08E-18 |
| AL591895  | 2.803406 | 10.15937 | 1.857558 | 3.09E-21 | 3.22E-20 |
| LINC01436 | 0.088615 | 1.690845 | 4.254042 | 5.70E-06 | 7.98E-06 |
| MUC20-O   | 0.327767 | 0.84424  | 1.364981 | 5.80E-18 | 2.66E-17 |
| LINC00997 | 0.581848 | 1.178157 | 1.017817 | 8.01E-16 | 2.78E-15 |



|           |          |          |          |          |          |
|-----------|----------|----------|----------|----------|----------|
| STPG3-AS  | 0.139222 | 0.77431  | 2.475524 | 2.17E-14 | 6.41E-14 |
| AC145343  | 0.145612 | 0.786465 | 2.433257 | 5.73E-18 | 2.65E-17 |
| AC004918  | 0.394433 | 1.168577 | 1.5669   | 4.77E-18 | 2.25E-17 |
| AC108134  | 0.14337  | 0.57769  | 2.010556 | 7.32E-14 | 2.00E-13 |
| AC253536  | 0.418573 | 1.685762 | 2.00985  | 3.37E-09 | 5.96E-09 |
| LINC01186 | 0.076483 | 0.778008 | 3.346572 | 1.61E-14 | 4.83E-14 |
| AC024060  | 0.86913  | 2.733276 | 1.652988 | 8.19E-23 | 1.19E-21 |
| SNHG17    | 1.42856  | 3.703286 | 1.374244 | 3.19E-16 | 1.19E-15 |
| SBF2-AS1  | 0.233662 | 0.755556 | 1.693116 | 3.38E-22 | 4.31E-21 |
| SNHG21    | 0.193549 | 0.642201 | 1.730323 | 6.92E-21 | 6.17E-20 |
| AC079922  | 0.431565 | 0.885701 | 1.037243 | 4.72E-13 | 1.20E-12 |
| LINC02428 | 10.75337 | 4.042471 | -1.41148 | 4.04E-17 | 1.67E-16 |
| ALDH1L1-  | 0.319396 | 0.689547 | 1.110303 | 0.003118 | 0.003628 |
| AC007996  | 0.225625 | 0.713521 | 1.661032 | 1.58E-15 | 5.24E-15 |
| Z98257.1  | 0.170202 | 0.806715 | 2.244809 | 1.08E-08 | 1.84E-08 |
| AC243964  | 0.765912 | 1.811367 | 1.241828 | 1.96E-06 | 2.84E-06 |
| LINC01086 | 0.248189 | 1.233953 | 2.313775 | 3.82E-26 | 2.83E-24 |
| AC008915  | 0.92107  | 1.967004 | 1.094618 | 1.56E-15 | 5.22E-15 |
| AL360181. | 0.334574 | 0.846639 | 1.33942  | 5.23E-10 | 9.99E-10 |
| AC139100  | 0.144009 | 0.980064 | 2.766721 | 6.93E-22 | 8.55E-21 |
| SNHG32    | 9.754471 | 36.20809 | 1.892177 | 3.75E-25 | 1.39E-23 |
| DSCR8     | 0.002448 | 1.188885 | 8.924002 | 8.02E-09 | 1.39E-08 |
| AL021707. | 0.447574 | 1.213484 | 1.438958 | 5.47E-12 | 1.26E-11 |
| AL022328. | 0.734639 | 2.099015 | 1.514605 | 6.21E-17 | 2.48E-16 |
| AC026401  | 0.913817 | 3.270511 | 1.839539 | 2.24E-18 | 1.11E-17 |
| SNHG9     | 3.260921 | 9.528414 | 1.546957 | 1.33E-10 | 2.69E-10 |
| LINC01176 | 0.43653  | 1.210682 | 1.471667 | 1.29E-15 | 4.34E-15 |
