# Supplementary material for: Construction of a novel immune-related lncRNA signature and its potential to predict the immune status of patients with hepatocellular carcinoma
Source: Springer Nature journal article supplement (doi:10.1186/s12885-021-09059-x), 2021-12-01
Supplement: MOESM3 [file 19968004]

| Id       | futime | fustat | age | gender | grade | stage      | T   | M  |
|----------|--------|--------|-----|--------|-------|------------|-----|----|
| TCGA-DD  | 2415   | 0      | 68  | MALE   | G2    | Stage II   | T2  | M0 |
| TCGA-KR- | 65     | 1      | 65  | MALE   | G1    | Stage I    | T1  | M0 |
| TCGA-DD  | 2456   | 1      | 61  | FEMALE | G2    | Stage I    | T1  | M0 |
| TCGA-CC- | 347    | 1      | 63  | MALE   | G3    | Stage IIIA | T3  | M0 |
| TCGA-G3- | 361    | 0      | 38  | MALE   | G2    | Stage II   | T2  | M0 |
| TCGA-DD  | 763    | 0      | 51  | MALE   | G3    | Stage I    | T1  | M0 |
| TCGA-DD  | 555    | 0      | 45  | FEMALE | G4    | Stage IIIA | T3a | M0 |
| TCGA-CC- | 300    | 1      | 45  | MALE   | G3    | Stage IIIA | T3  | M0 |
| TCGA-DD  | 612    | 1      | 37  | MALE   | G3    | Stage IIIA | T3  | M0 |
| TCGA-DD  | 1242   | 0      | 51  | MALE   | G4    | Stage I    | T1  | M0 |
| TCGA-G3- | 860    | 0      | 68  | MALE   | G2    | Stage I    | T1  | M0 |
| TCGA-DD  | 644    | 0      | 72  | MALE   | G2    | Stage I    | T1  | M0 |
| TCGA-LG- | 425    | 0      | 48  | MALE   | G2    | Stage I    | T1  | M0 |
| TCGA-DD  | 784    | 0      | 73  | MALE   | G2    | Stage I    | T1  | M0 |
| TCGA-DD  | 1989   | 0      | 55  | MALE   | G2    | Stage IIIA | T3  | M0 |
| TCGA-2Y- | 697    | 0      | 70  | MALE   | G2    | Stage I    | T1  | MX |
| TCGA-5C- | 20     | 0      | 61  | MALE   | G1    | Stage II   | T2  | M0 |
| TCGA-EP- | 357    | 0      | 52  | FEMALE | G3    | Stage IIIA | T3a | MX |
| TCGA-DD  | 283    | 1      | 72  | FEMALE | G2    | Stage I    | T1  | M0 |
| TCGA-UB- | 52     | 1      | 67  | MALE   | G3    | Stage I    | T1  | MX |
| TCGA-DD  | 2425   | 0      | 55  | FEMALE | G3    | Stage II   | T2  | M0 |
| TCGA-5C- | 322    | 0      | 70  | MALE   | G2    | Stage I    | T1  | M0 |
| TCGA-ED- | 482    | 0      | 60  | FEMALE | G2    | Stage II   | T2  | M0 |
| TCGA-BC- | 837    | 1      | 69  | MALE   | G2    | unknow     | T2  | MX |
| TCGA-DD  | 643    | 1      | 77  | MALE   | G3    | Stage II   | T2  | M0 |
| TCGA-ED- | 423    | 0      | 74  | MALE   | G2    | Stage I    | T1  | M0 |
| TCGA-G3- | 372    | 0      | 50  | MALE   | G1    | Stage I    | T1  | M0 |
| TCGA-ZS- | 1386   | 1      | 73  | MALE   | G2    | Stage II   | T2  | MX |
| TCGA-GJ- | 67     | 1      | 68  | MALE   | G2    | Stage I    | T1  | MX |
| TCGA-G3- | 27     | 1      | 83  | FEMALE | G1    | Stage I    | T1  | M0 |
| TCGA-DD  | 458    | 0      | 45  | MALE   | G3    | Stage I    | T1  | M0 |
| TCGA-DD  | 1711   | 0      | 46  | MALE   | G1    | Stage I    | T1  | M0 |
| TCGA-CC- | 97     | 1      | 44  | MALE   | G2    | Stage II   | T2  | M0 |
| TCGA-UB- | 500    | 0      | 59  | MALE   | G3    | Stage IIIA | T3a | MX |
| TCGA-CC- | 649    | 1      | 59  | MALE   | G1    | Stage IIIA | T3  | M0 |
| TCGA-4R- | 262    | 1      | 66  | MALE   | G2    | Stage II   | T2  | MX |
| TCGA-DD  | 701    | 0      | 65  | FEMALE | G1    | Stage IIIA | T3a | M0 |
| TCGA-CC- | 250    | 0      | 60  | FEMALE | G2    | Stage IIIC | T4  | M0 |
| TCGA-2Y- | 1271   | 1      | 64  | MALE   | G2    | Stage I    | T1  | MX |
| TCGA-BC- | 1423   | 1      | 81  | MALE   | G1    | unknow     | T3  | MX |
| TCGA-UB- | 486    | 0      | 51  | MALE   | G2    | Stage I    | T1  | MX |
| TCGA-ED- | 6      | 0      | 54  | MALE   | G2    | Stage IIIA | T3a | M0 |
| TCGA-XR- | 693    | 1      | 74  | MALE   | G1    | Stage I    | T1  | MX |
| TCGA-CC- | 399    | 0      | 54  | MALE   | G3    | Stage IIIA | T3  | M0 |
| TCGA-DD  | 436    | 0      | 59  | MALE   | G3    | Stage II   | T2  | M0 |
| TCGA-K7- | 512    | 0      | 66  | MALE   | G2    | Stage I    | T1  | MX |
| TCGA-CC- | 102    | 1      | 71  | MALE   | G2    | Stage IIIA | T3  | M0 |
| TCGA-DD  | 171    | 1      | 67  | MALE   | G3    | Stage I    | T1  | M0 |
| TCGA-ED- | 56     | 1      | 50  | FEMALE | G3    | Stage IIIA | T3a | M0 |
| TCGA-DD  | 2759   | 1      | 70  | MALE   | G2    | Stage I    | T1  | M0 |
| TCGA-DD  | 602    | 0      | 20  | FEMALE | G3    | Stage I    | T1  | M0 |
| TCGA-DD  | 2542   | 1      | 53  | MALE   | G2    | Stage IIIA | T3  | M0 |
| TCGA-HP- | 91     | 1      | 78  | MALE   | G2    | Stage I    | T1  | M0 |
| TCGA-DD  | 558    | 1      | 64  | FEMALE | G2    | Stage IVB  | T4  | M1 |
| TCGA-DD  | 638    | 0      | 51  | MALE   | G3    | Stage I    | T1  | M0 |
| TCGA-CC- | 272    | 1      | 48  | MALE   | G2    | Stage IIIB | T4  | M0 |
| TCGA-NI- | 606    | 0      | 74  | MALE   | G3    | Stage I    | T1  | MX |

|          |      |   |           |    |            |        |    |
|----------|------|---|-----------|----|------------|--------|----|
| TCGA-BW  | 20   | 0 | 50 MALE   | G2 | Stage IIIA | T3a    | MX |
| TCGA-CC- | 304  | 1 | 45 MALE   | G2 | Stage IIIA | T3     | M0 |
| TCGA-DD  | 394  | 1 | 57 FEMALE | G3 | Stage I    | T1     | M0 |
| TCGA-GJ- | 879  | 0 | 59 MALE   | G2 | Stage I    | T1     | MX |
| TCGA-DD  | 2202 | 0 | 46 MALE   | G2 | Stage II   | T2     | M0 |
| TCGA-G3- | 671  | 0 | 65 MALE   | G2 | Stage IIIB | T3b    | M0 |
| TCGA-CC- | 0    | 0 | 52 FEMALE | G2 | Stage IIIA | T3a    | M0 |
| TCGA-DD  | 1295 | 0 | 43 MALE   | G2 | Stage I    | T1     | M0 |
| TCGA-2Y- | 1939 | 0 | 55 FEMALE | G2 | Stage I    | T1     | MX |
| TCGA-MI- | 698  | 0 | 63 MALE   | G2 | Stage II   | T2     | M0 |
| TCGA-FV- | 2486 | 1 | 78 MALE   | G2 | Stage IIIA | T3     | M0 |
| TCGA-PD- | 639  | 1 | 58 FEMALE | G2 | Stage IIIB | T4     | M0 |
| TCGA-DD  | 931  | 1 | 64 FEMALE | G2 | Stage IVB  | T4     | M1 |
| TCGA-DD  | 2301 | 0 | 65 MALE   | G3 | Stage I    | T1     | M0 |
| TCGA-DD  | 1855 | 0 | 69 MALE   | G2 | Stage I    | T1     | M0 |
| TCGA-DD  | 1231 | 0 | 51 MALE   | G4 | Stage I    | T1     | M0 |
| TCGA-XR- | 898  | 0 | 58 MALE   | G2 | Stage I    | T1     | M0 |
| TCGA-UB- | 314  | 0 | 69 FEMALE | G1 | Stage I    | unknow | MX |
| TCGA-CC- | 217  | 1 | 57 MALE   | G2 | Stage IIIA | T3     | M0 |
| TCGA-BC- | 387  | 0 | 69 MALE   | G1 | Stage I    | T1     | M0 |
| TCGA-DD  | 566  | 0 | 50 MALE   | G2 | Stage I    | T1     | M0 |
| TCGA-CC- | 101  | 1 | 50 MALE   | G3 | Stage IIIA | T3     | M0 |
| TCGA-ZP- | 21   | 0 | 56 FEMALE | G2 | unknow     | T1     | MX |
| TCGA-EP- | 303  | 0 | 76 MALE   | G2 | Stage I    | T1     | MX |
| TCGA-CC- | 278  | 1 | 61 MALE   | G1 | Stage IIIA | T3     | M0 |
| TCGA-CC- | 129  | 1 | 35 MALE   | G1 | Stage IIIA | T3     | M0 |
| TCGA-G3- | 1779 | 0 | 73 MALE   | G3 | Stage II   | T2     | M0 |
| TCGA-WQ  | 30   | 0 | 71 FEMALE | G3 | unknow     | T3a    | M0 |
| TCGA-G3- | 655  | 0 | 58 MALE   | G2 | Stage I    | T1     | M0 |
| TCGA-DD  | 170  | 0 | 66 MALE   | G3 | Stage II   | T2     | M0 |
| TCGA-DD  | 141  | 0 | 59 FEMALE | G2 | Stage I    | T1     | M0 |
| TCGA-UB- | 327  | 0 | 60 MALE   | G2 | Stage II   | T2     | MX |
| TCGA-RG- | 1098 | 0 | 69 MALE   | G2 | Stage II   | T2     | M0 |
| TCGA-MI- | 630  | 0 | 61 MALE   | G1 | unknow     | T2     | MX |
| TCGA-DD  | 1718 | 0 | 38 MALE   | G2 | Stage II   | T2     | M0 |
| TCGA-EP- | 19   | 1 | 62 MALE   | G3 | Stage I    | T1     | MX |
| TCGA-DD  | 898  | 0 | 59 MALE   | G4 | Stage I    | T1     | MX |
| TCGA-DD  | 2018 | 0 | 61 MALE   | G1 | Stage IIIA | T3     | M0 |
| TCGA-T1- | 23   | 0 | 68 MALE   | G2 | unknow     | T1     | M0 |
| TCGA-DD  | 1210 | 1 | 80 FEMALE | G2 | Stage IIIA | T3     | M0 |
| TCGA-CC- | 382  | 0 | 56 MALE   | G3 | Stage II   | T2     | M0 |
| TCGA-DD  | 2028 | 0 | 58 MALE   | G3 | Stage I    | T1     | M0 |
| TCGA-DD  | 690  | 0 | 65 FEMALE | G3 | Stage IIIB | T3b    | M0 |
| TCGA-BD- | 1363 | 0 | 69 MALE   | G2 | unknow     | T2     | MX |
| TCGA-G3- | 673  | 0 | 80 MALE   | G2 | Stage I    | T1     | M0 |
| TCGA-RC- | 0    | 0 | 24 MALE   | G3 | Stage II   | T2     | M0 |
| TCGA-DD  | 2324 | 0 | 74 FEMALE | G3 | Stage I    | T1     | M0 |
| TCGA-BC- | 711  | 1 | 76 MALE   | G3 | unknow     | T4     | MX |
| TCGA-CC- | 248  | 0 | 68 MALE   | G2 | Stage IIIA | T3     | M0 |
| TCGA-DD  | 415  | 1 | 23 MALE   | G3 | Stage II   | T2     | M0 |
| TCGA-DD  | 810  | 0 | 55 MALE   | G4 | Stage I    | T1     | M0 |
| TCGA-BC- | 91   | 1 | 50 MALE   | G3 | unknow     | T4     | MX |
| TCGA-CC- | 344  | 1 | 39 FEMALE | G3 | Stage IIIA | T3     | M0 |
| TCGA-RC- | 472  | 0 | 59 MALE   | G3 | Stage I    | T1     | M0 |
| TCGA-CC- | 129  | 1 | 48 MALE   | G2 | Stage II   | T2     | M0 |
| TCGA-UB- | 214  | 1 | 56 MALE   | G2 | Stage IIIA | T3a    | MX |
| TCGA-DD  | 107  | 1 | 66 FEMALE | G3 | Stage I    | T1     | M0 |
| TCGA-BC- | 837  | 1 | 76 MALE   | G1 | unknow     | T4     | MX |

|         |      |   |           |    |            |     |    |
|---------|------|---|-----------|----|------------|-----|----|
| TCGA-DD | 2184 | 0 | 62 MALE   | G3 | Stage I    | T1  | M0 |
| TCGA-BC | 2116 | 1 | 51 FEMALE | G1 | unknow     | T1  | MX |
| TCGA-ED | 390  | 0 | 20 FEMALE | G3 | Stage II   | T2  | M0 |
| TCGA-DD | 9    | 1 | 85 FEMALE | G3 | Stage I    | T1  | M0 |
| TCGA-BC | 562  | 0 | 66 FEMALE | G3 | Stage IIIC | T4  | M0 |
| TCGA-DD | 554  | 0 | 60 MALE   | G3 | Stage II   | T2  | M0 |
| TCGA-BC | 34   | 1 | 62 FEMALE | G2 | Stage I    | T1  | MX |
| TCGA-DD | 9    | 0 | 70 MALE   | G2 | Stage I    | T1  | M0 |
| TCGA-DD | 1067 | 0 | 51 MALE   | G3 | Stage II   | T2  | M0 |
| TCGA-DD | 1633 | 0 | 69 MALE   | G2 | Stage I    | T1  | M0 |
| TCGA-2Y | 848  | 1 | 82 FEMALE | G2 | Stage II   | T2  | MX |
| TCGA-DD | 1085 | 0 | 77 FEMALE | G1 | Stage I    | T1  | M0 |
| TCGA-DD | 1804 | 0 | 39 MALE   | G3 | Stage I    | T1  | M0 |
| TCGA-ED | 296  | 1 | 51 FEMALE | G3 | Stage IIIA | T3a | M0 |
| TCGA-G3 | 594  | 0 | 52 MALE   | G2 | Stage II   | T2  | M0 |
| TCGA-2Y | 1731 | 0 | 64 FEMALE | G3 | Stage I    | T1  | MX |
| TCGA-ED | 6    | 0 | 61 MALE   | G2 | Stage II   | T2  | M0 |
| TCGA-DD | 1618 | 0 | 69 MALE   | G3 | Stage II   | T2  | M0 |
| TCGA-DD | 1622 | 1 | 68 MALE   | G3 | Stage IIIA | T3  | M0 |
| TCGA-DD | 719  | 0 | 59 FEMALE | G3 | Stage I    | T1  | M0 |
| TCGA-DD | 1149 | 1 | 42 MALE   | G3 | Stage II   | T2  | M0 |
| TCGA-ZS | 2412 | 0 | 64 MALE   | G2 | Stage II   | T2  | MX |
| TCGA-RC | 9    | 0 | 75 MALE   | G3 | Stage II   | T2  | M0 |
| TCGA-5R | 364  | 0 | 57 MALE   | G2 | Stage II   | T2  | M0 |
| TCGA-CC | 103  | 1 | 67 MALE   | G1 | Stage IIIC | T4  | M0 |
| TCGA-DD | 1876 | 0 | 40 MALE   | G3 | Stage I    | T1  | M0 |
| TCGA-ZP | 782  | 0 | 66 FEMALE | G1 | unknow     | T1  | MX |
| TCGA-ZP | 395  | 0 | 64 FEMALE | G1 | unknow     | T1  | MX |
| TCGA-ZS | 1241 | 0 | 79 FEMALE | G1 | Stage II   | T2  | MX |
| TCGA-DD | 1823 | 0 | 56 MALE   | G2 | Stage I    | T1  | M0 |
| TCGA-XR | 1339 | 0 | 43 FEMALE | G2 | Stage I    | T1  | MX |
| TCGA-DD | 827  | 1 | 29 FEMALE | G2 | Stage III  | T3  | M0 |
| TCGA-BC | 444  | 0 | 64 MALE   | G3 | Stage II   | T2  | M0 |
| TCGA-DD | 1008 | 0 | 67 FEMALE | G3 | Stage IIIC | T2  | M0 |
| TCGA-MI | 507  | 0 | 61 MALE   | G2 | Stage IIIC | T4  | M0 |
| TCGA-DD | 1900 | 0 | 38 MALE   | G2 | Stage I    | T1  | M0 |
| TCGA-G3 | 621  | 0 | 70 MALE   | G2 | Stage II   | T2  | M0 |
| TCGA-ED | 400  | 0 | 53 FEMALE | G3 | Stage II   | T2  | M0 |
| TCGA-EP | 334  | 0 | 46 FEMALE | G2 | Stage I    | T1  | MX |
| TCGA-DD | 561  | 0 | 67 MALE   | G2 | Stage II   | T2  | M0 |
| TCGA-CC | 0    | 0 | 57 MALE   | G2 | Stage IIIA | T3  | M0 |
| TCGA-WQ | 395  | 0 | 62 MALE   | G2 | Stage II   | T2  | M0 |
| TCGA-G3 | 359  | 1 | 51 MALE   | G3 | Stage IIIC | T4  | M0 |
| TCGA-CC | 363  | 0 | 54 MALE   | G2 | Stage IIIA | T3  | M0 |
| TCGA-G3 | 480  | 0 | 48 MALE   | G2 | Stage I    | T1  | M0 |
| TCGA-DD | 1769 | 0 | 48 MALE   | G3 | Stage II   | T2  | M0 |
| TCGA-DD | 1560 | 1 | 57 FEMALE | G2 | Stage I    | T1  | M0 |
| TCGA-DD | 365  | 1 | 68 MALE   | G3 | Stage I    | T1  | M0 |
| TCGA-BD | 409  | 0 | 75 FEMALE | G2 | Stage I    | T1  | M0 |
| TCGA-ED | 386  | 0 | 58 MALE   | G3 | Stage II   | T2  | M0 |
| TCGA-DD | 79   | 0 | 67 MALE   | G3 | Stage I    | T1  | M0 |
| TCGA-QA | 94   | 0 | 48 MALE   | G2 | Stage II   | T2  | MX |
| TCGA-DD | 636  | 0 | 58 MALE   | G4 | Stage I    | T1  | M0 |
| TCGA-2Y | 357  | 0 | 68 FEMALE | G2 | Stage I    | T1  | MX |
| TCGA-2Y | 757  | 1 | 64 FEMALE | G3 | Stage II   | T2  | MX |
| TCGA-DD | 44   | 0 | 66 MALE   | G1 | Stage I    | T1  | M0 |
| TCGA-RC | 579  | 0 | 66 MALE   | G2 | Stage I    | T1  | M0 |
| TCGA-BC | 498  | 0 | 68 FEMALE | G3 | Stage II   | T2  | M0 |

|         |      |   |           |        |            |        |    |
|---------|------|---|-----------|--------|------------|--------|----|
| TCGA-DD | 2752 | 0 | 48 MALE   | G1     | Stage I    | T1     | M0 |
| TCGA-ED | 408  | 0 | 47 MALE   | G2     | Stage II   | T2     | M0 |
| TCGA-DD | 1424 | 0 | 43 MALE   | G3     | Stage I    | T1     | M0 |
| TCGA-3K | 396  | 0 | 65 MALE   | G1     | Stage IIIB | T3b    | MX |
| TCGA-G3 | 447  | 0 | 76 MALE   | G2     | Stage I    | T1     | MX |
| TCGA-FV | 194  | 1 | 75 MALE   | unknow | Stage I    | T1     | MX |
| TCGA-BD | 1115 | 0 | 62 MALE   | G2     | Stage II   | T2     | MX |
| TCGA-DD | 555  | 0 | 55 FEMALE | G2     | Stage I    | T1     | M0 |
| TCGA-DD | 1450 | 0 | 61 MALE   | G3     | Stage I    | T1     | M0 |
| TCGA-DD | 183  | 0 | 46 MALE   | G2     | Stage I    | T1     | M0 |
| TCGA-2Y | 260  | 0 | 66 MALE   | G2     | Stage I    | T1     | MX |
| TCGA-CC | 219  | 0 | 24 FEMALE | G1     | Stage IIIA | T3     | M0 |
| TCGA-XR | 925  | 0 | 16 MALE   | G1     | Stage IIIA | T3     | MX |
| TCGA-CC | 140  | 1 | 74 MALE   | G2     | Stage IIIA | T3     | M0 |
| TCGA-G3 | 520  | 0 | 58 MALE   | G3     | Stage II   | T2     | M0 |
| TCGA-ES | 688  | 1 | 80 MALE   | G2     | Stage I    | T1     | MX |
| TCGA-FV | 729  | 0 | 80 MALE   | G2     | Stage I    | T1     | MX |
| TCGA-DD | 1567 | 0 | 59 MALE   | G3     | Stage I    | T1     | M0 |
| TCGA-RC | 468  | 0 | 42 MALE   | G3     | Stage II   | T2     | M0 |
| TCGA-ZP | 743  | 0 | 51 MALE   | G2     | unknow     | T2     | MX |
| TCGA-DD | 1562 | 0 | 69 FEMALE | G2     | Stage I    | T1     | M0 |
| TCGA-DD | 1145 | 0 | 70 MALE   | G3     | Stage IIIA | T3a    | M0 |
| TCGA-2Y | 3675 | 0 | 49 MALE   | G1     | Stage IIIA | T3     | M0 |
| TCGA-G3 | 65   | 1 | 53 FEMALE | G3     | Stage IIIA | T3a    | M0 |
| TCGA-DD | 693  | 0 | 68 FEMALE | G1     | Stage II   | T2     | MX |
| TCGA-FV | 581  | 1 | 75 MALE   | G1     | Stage I    | T1     | M0 |
| TCGA-DD | 1049 | 0 | 68 FEMALE | G3     | Stage II   | T2     | M0 |
| TCGA-DD | 660  | 1 | 75 FEMALE | G3     | Stage IIIA | T3a    | M0 |
| TCGA-CC | 299  | 1 | 47 MALE   | G2     | Stage II   | T2     | M0 |
| TCGA-DD | 2017 | 0 | 72 FEMALE | G2     | Stage I    | T1     | M0 |
| TCGA-DD | 3437 | 0 | 77 FEMALE | G2     | Stage II   | T2     | M0 |
| TCGA-5R | 46   | 1 | 65 FEMALE | G2     | Stage II   | T2     | M0 |
| TCGA-DD | 2728 | 0 | 38 MALE   | G2     | Stage I    | T1     | M0 |
| TCGA-G3 | 1636 | 0 | 63 FEMALE | G3     | Stage I    | T1     | M0 |
| TCGA-G3 | 430  | 0 | 31 MALE   | G1     | Stage I    | T1     | MX |
| TCGA-DD | 3125 | 1 | 66 FEMALE | G2     | Stage III  | T3     | M0 |
| TCGA-DD | 171  | 1 | 63 FEMALE | G4     | Stage I    | T1     | M0 |
| TCGA-BC | 421  | 0 | 75 FEMALE | G3     | Stage II   | T2     | M0 |
| TCGA-ED | 427  | 0 | 29 MALE   | G2     | Stage IIIA | T3a    | M0 |
| TCGA-FV | 1    | 0 | 51 FEMALE | G2     | Stage II   | T2     | M0 |
| TCGA-DD | 1495 | 0 | 23 MALE   | G3     | Stage III  | T3     | M0 |
| TCGA-FV | 1852 | 1 | 70 FEMALE | unknow | Stage II   | T2     | M0 |
| TCGA-MI | 291  | 0 | 64 MALE   | G3     | Stage I    | T1     | M0 |
| TCGA-DD | 3104 | 0 | 32 MALE   | G3     | Stage I    | T1     | M0 |
| TCGA-DD | 115  | 1 | 64 FEMALE | G4     | Stage I    | T1     | M0 |
| TCGA-DD | 575  | 0 | 65 MALE   | G3     | Stage I    | T1     | M0 |
| TCGA-EP | 363  | 0 | 73 MALE   | G2     | Stage IIIA | T3a    | MX |
| TCGA-BC | 1490 | 1 | 74 FEMALE | G3     | Stage IIIA | T3     | M0 |
| TCGA-FV | 848  | 0 | 76 FEMALE | G2     | Stage II   | T2     | M0 |
| TCGA-UB | 601  | 0 | 24 MALE   | G3     | Stage II   | T2     | MX |
| TCGA-ZP | 706  | 0 | 72 MALE   | G1     | unknow     | T1     | MX |
| TCGA-MI | 747  | 0 | 77 MALE   | unknow | unknow     | unknow | MX |
| TCGA-G3 | 698  | 0 | 59 MALE   | G2     | Stage I    | T1     | M0 |
| TCGA-DD | 137  | 0 | 73 FEMALE | G2     | Stage I    | T1     | M0 |
| TCGA-ED | 408  | 0 | 60 FEMALE | G2     | Stage IIIA | T3a    | M0 |
| TCGA-BC | 547  | 1 | 69 MALE   | G3     | Stage IIIA | T3a    | M0 |
| TCGA-DD | 1531 | 0 | 72 MALE   | G2     | Stage I    | T1     | M0 |
| TCGA-2Y | 1624 | 1 | 51 MALE   | G2     | Stage I    | T1     | MX |

|          |      |   |           |        |            |     |    |
|----------|------|---|-----------|--------|------------|-----|----|
| TCGA-XR- | 1030 | 0 | 49 FEMALE | G3     | Stage IIIB | T3  | M0 |
| TCGA-2Y- | 1452 | 0 | 68 MALE   | G2     | Stage I    | T1  | MX |
| TCGA-DD  | 381  | 1 | 48 MALE   | G4     | Stage I    | T1  | M0 |
| TCGA-BC- | 153  | 1 | 80 MALE   | G2     | unknow     | T3  | MX |
| TCGA-2Y- | 2532 | 1 | 54 FEMALE | G1     | Stage I    | T1  | MX |
| TCGA-DD  | 1066 | 0 | 70 FEMALE | G3     | Stage I    | T1  | M0 |
| TCGA-CC- | 87   | 1 | 61 FEMALE | G1     | Stage IIIC | T4  | M0 |
| TCGA-LG- | 387  | 0 | 79 FEMALE | G2     | Stage II   | T2  | M0 |
| TCGA-G3- | 476  | 0 | 58 MALE   | G2     | Stage I    | T1  | M0 |
| TCGA-DD  | 432  | 1 | 50 MALE   | G3     | Stage II   | T2  | M0 |
| TCGA-KR- | 407  | 0 | 61 FEMALE | G1     | Stage II   | T2  | M0 |
| TCGA-DD  | 760  | 0 | 54 FEMALE | G2     | Stage II   | T2  | M0 |
| TCGA-DD  | 2455 | 0 | 56 MALE   | G3     | Stage II   | T2  | M0 |
| TCGA-DD  | 16   | 1 | 72 MALE   | G3     | Stage I    | T1  | M0 |
| TCGA-G3- | 935  | 0 | 79 FEMALE | G2     | Stage IIIB | T3b | M0 |
| TCGA-WJ- | 345  | 0 | 68 FEMALE | G2     | Stage I    | T1  | MX |
| TCGA-CC- | 315  | 1 | 36 MALE   | G1     | Stage IIIA | T3  | M0 |
| TCGA-G3- | 361  | 0 | 65 MALE   | G1     | Stage I    | T1  | MX |
| TCGA-DD  | 425  | 1 | 53 MALE   | G3     | Stage I    | T1  | M0 |
| TCGA-DD  | 1685 | 1 | 61 MALE   | G2     | Stage I    | T1  | M0 |
| TCGA-G3- | 1553 | 0 | 45 FEMALE | G2     | Stage IIIA | T3  | M0 |
| TCGA-G3- | 780  | 0 | 53 MALE   | G2     | Stage IIIA | T3a | M0 |
| TCGA-HP- | 752  | 1 | 90 FEMALE | unknow | unknow     | TX  | M0 |
| TCGA-DD  | 419  | 1 | 67 MALE   | G3     | Stage IIIB | T3b | M0 |
| TCGA-BC- | 352  | 0 | 73 MALE   | G3     | Stage IIIA | T3  | MX |
| TCGA-2Y- | 36   | 1 | 70 MALE   | G2     | Stage II   | T2  | MX |
| TCGA-WX  | 615  | 0 | 64 FEMALE | G3     | Stage I    | T1  | MX |
| TCGA-DD  | 601  | 1 | 43 FEMALE | G2     | Stage II   | T2  | M0 |
| TCGA-DD  | 1345 | 0 | 54 MALE   | G3     | Stage I    | T1  | M0 |
| TCGA-2Y- | 1168 | 0 | 81 FEMALE | G2     | Stage I    | T1  | MX |
| TCGA-DD  | 1005 | 1 | 71 FEMALE | G2     | Stage IIIC | T1  | M0 |
| TCGA-DD  | 802  | 1 | 77 MALE   | G2     | Stage IIIA | T3a | M0 |
| TCGA-CC- | 211  | 0 | 55 MALE   | G2     | Stage II   | T2  | M0 |
| TCGA-DD  | 2245 | 0 | 65 MALE   | G1     | Stage I    | T1  | M0 |
| TCGA-DD  | 1970 | 0 | 56 MALE   | G2     | Stage IIIA | T3  | M0 |
| TCGA-G3- | 452  | 1 | 52 FEMALE | G3     | Stage I    | T1  | M0 |
| TCGA-BC- | 8    | 0 | 66 FEMALE | G2     | Stage I    | T1  | M0 |
| TCGA-DD  | 223  | 1 | 40 MALE   | G3     | Stage IV   | T3a | M1 |
| TCGA-DD  | 2513 | 0 | 44 MALE   | G2     | Stage I    | T1  | M0 |
| TCGA-UB- | 535  | 0 | 62 FEMALE | G2     | Stage II   | T2b | M0 |
| TCGA-ZS- | 341  | 0 | 55 MALE   | G2     | Stage II   | T2  | MX |
| TCGA-ES- | 438  | 1 | 54 MALE   | G2     | Stage I    | T1  | MX |
| TCGA-G3- | 56   | 1 | 70 MALE   | G2     | Stage IIIB | T3b | MX |
| TCGA-DD  | 1085 | 0 | 43 FEMALE | G3     | Stage I    | T1  | M0 |
| TCGA-CC- | 262  | 1 | 59 MALE   | G3     | Stage IIIA | T3  | M0 |
| TCGA-DD  | 587  | 0 | 48 MALE   | G3     | Stage I    | T1  | M0 |
| TCGA-FV- | 12   | 0 | 52 MALE   | G2     | Stage I    | T1  | M0 |
| TCGA-DD  | 12   | 1 | 58 MALE   | G3     | Stage II   | T2  | M0 |
| TCGA-DD  | 2015 | 0 | 54 MALE   | G2     | Stage I    | T1  | M0 |
| TCGA-K7- | 359  | 0 | 61 MALE   | G2     | Stage II   | T2a | MX |
| TCGA-ED- | 406  | 0 | 59 FEMALE | G3     | Stage IIIA | T3a | M0 |
| TCGA-DD  | 3478 | 0 | 73 FEMALE | G3     | Stage I    | T1  | M0 |
| TCGA-DD  | 14   | 1 | 73 MALE   | G2     | Stage I    | T1  | M0 |
| TCGA-WX  | 756  | 0 | 61 MALE   | G1     | Stage II   | T2  | MX |
| TCGA-ED- | 406  | 0 | 35 MALE   | G3     | Stage IIIA | T3a | M0 |
| TCGA-BC- | 770  | 1 | 52 FEMALE | G2     | Stage IIIA | T3a | MX |
| TCGA-DD  | 474  | 0 | 63 MALE   | G2     | Stage I    | T1  | M0 |
| TCGA-MR  | 229  | 0 | 58 MALE   | G1     | Stage I    | T1  | MX |

|          |      |   |           |    |            |     |    |
|----------|------|---|-----------|----|------------|-----|----|
| TCGA-LG- | 366  | 0 | 68 MALE   | G2 | Stage IIIA | T3a | M0 |
| TCGA-FV- | 10   | 0 | 84 FEMALE | G2 | Stage I    | T1  | M0 |
| TCGA-5C- | 328  | 0 | 58 MALE   | G2 | Stage II   | T2  | M0 |
| TCGA-BC- | 308  | 1 | 66 FEMALE | G2 | unknow     | T3  | MX |
| TCGA-DD  | 410  | 1 | 81 FEMALE | G4 | Stage I    | T1  | MX |
| TCGA-DD  | 728  | 0 | 71 MALE   | G2 | Stage I    | T1  | M0 |
| TCGA-BW  | 0    | 0 | 63 MALE   | G3 | Stage I    | T1  | MX |
| TCGA-DD  | 391  | 0 | 25 MALE   | G2 | Stage I    | T1  | M0 |
| TCGA-DD  | 453  | 0 | 55 MALE   | G3 | Stage I    | T1  | M0 |
| TCGA-FV- | 366  | 1 | 38 FEMALE | G2 | Stage I    | T1  | MX |
| TCGA-RC- | 588  | 0 | 53 MALE   | G2 | Stage II   | T2  | M0 |
| TCGA-DD  | 658  | 0 | 66 MALE   | G2 | Stage I    | T1  | M0 |
| TCGA-DD  | 1372 | 1 | 76 MALE   | G3 | Stage I    | T1  | M0 |
| TCGA-G3- | 180  | 0 | 71 MALE   | G2 | Stage I    | T1  | M0 |
| TCGA-DD  | 564  | 0 | 51 FEMALE | G4 | Stage I    | T1  | M0 |
| TCGA-DD  | 662  | 0 | 69 MALE   | G3 | Stage I    | T1  | M0 |
| TCGA-WX  | 556  | 1 | 33 FEMALE | G2 | Stage IIIA | T3a | MX |
| TCGA-NI- | 1791 | 1 | 71 MALE   | G1 | Stage IIIA | T3  | MX |
| TCGA-2Y- | 1516 | 0 | 45 MALE   | G1 | Stage II   | T2  | MX |
| TCGA-BC- | 1351 | 0 | 62 FEMALE | G2 | Stage IIIA | T3  | M0 |
| TCGA-2Y- | 555  | 1 | 59 FEMALE | G3 | Stage I    | T1  | MX |
| TCGA-EP- | 330  | 0 | 62 MALE   | G1 | Stage I    | T1  | MX |
| TCGA-DD  | 415  | 0 | 64 MALE   | G3 | Stage I    | T1  | M0 |
| TCGA-DD  | 2131 | 1 | 76 FEMALE | G1 | Stage I    | T1  | M0 |
| TCGA-DD  | 785  | 1 | 70 MALE   | G2 | Stage I    | T1  | M0 |
| TCGA-DD  | 2232 | 0 | 56 FEMALE | G3 | Stage I    | T1  | M0 |
| TCGA-G3- | 354  | 0 | 67 MALE   | G2 | Stage II   | T2  | M0 |
| TCGA-DD  | 478  | 0 | 60 MALE   | G2 | Stage I    | T1  | M0 |
| TCGA-2Y- | 633  | 1 | 85 FEMALE | G2 | unknow     | T1  | MX |
| TCGA-G3- | 416  | 1 | 64 MALE   | G2 | Stage I    | T1  | M0 |
| TCGA-RC- | 15   | 0 | 20 FEMALE | G2 | Stage IVA  | T1  | M0 |
| TCGA-DD  | 608  | 0 | 49 FEMALE | G1 | Stage I    | T1  | M0 |
| TCGA-DD  | 195  | 1 | 69 MALE   | G3 | Stage II   | T2  | M0 |
| TCGA-DD  | 1219 | 0 | 73 FEMALE | G2 | Stage I    | T1  | M0 |
| TCGA-CC- | 365  | 0 | 58 MALE   | G1 | Stage IIIA | T3  | M0 |
| TCGA-DD  | 722  | 0 | 69 MALE   | G3 | Stage I    | T1  | M0 |
| TCGA-DD  | 1233 | 0 | 66 FEMALE | G3 | Stage I    | T1  | M0 |
| TCGA-DD  | 1694 | 1 | 78 FEMALE | G2 | Stage I    | T1  | M0 |
| TCGA-DD  | 1202 | 0 | 50 MALE   | G4 | Stage I    | T1  | M0 |
| TCGA-K7- | 519  | 0 | 66 MALE   | G1 | Stage I    | T1  | MX |
| TCGA-DD  | 2317 | 0 | 35 MALE   | G2 | Stage I    | T1  | M0 |
| TCGA-G3- | 768  | 1 | 44 MALE   | G2 | Stage II   | T2  | M0 |
| TCGA-MR  | 330  | 0 | 34 MALE   | G3 | Stage I    | T1  | MX |
| TCGA-DD  | 552  | 0 | 52 MALE   | G3 | Stage I    | T1  | M0 |
| TCGA-DD  | 899  | 1 | 56 FEMALE | G3 | Stage I    | T1  | M0 |
| TCGA-BW  | 0    | 0 | 26 FEMALE | G3 | Stage IV   | T2  | M1 |
| TCGA-CC- | 279  | 1 | 51 FEMALE | G2 | Stage II   | T2  | M0 |
| TCGA-G3- | 585  | 0 | 61 MALE   | G2 | Stage I    | T1  | M0 |
| TCGA-EP- | 237  | 0 | 70 MALE   | G2 | Stage I    | T1  | MX |
| TCGA-2Y- | 2442 | 0 | 68 MALE   | G2 | Stage I    | T1  | MX |
| TCGA-RC- | 640  | 0 | 47 FEMALE | G3 | Stage I    | T1  | M0 |
| TCGA-YA- | 412  | 1 | 68 MALE   | G3 | Stage IIIA | T3a | MX |
| TCGA-DD  | 535  | 1 | 45 MALE   | G2 | Stage I    | T1  | M0 |
| TCGA-O8- | 538  | 0 | 54 MALE   | G2 | Stage I    | T1  | MX |
| TCGA-ZP- | 717  | 0 | 67 FEMALE | G1 | unknow     | T1  | MX |
| TCGA-DD  | 349  | 1 | 73 MALE   | G3 | Stage IIIA | T3  | M0 |
| TCGA-DD  | 3258 | 1 | 72 FEMALE | G2 | Stage II   | T2  | M0 |
| TCGA-RC- | 22   | 0 | 74 FEMALE | G2 | Stage IIIA | T3  | MX |

|              |      |   |             |        |            |     |    |
|--------------|------|---|-------------|--------|------------|-----|----|
| TCGA-DD      | 672  | 0 | 66 MALE     | G3     | Stage IIIA | T3a | M0 |
| TCGA-K7-     | 631  | 0 | 64 MALE     | G1     | Stage I    | T1  | MX |
| TCGA-CC-     | 300  | 1 | 18 MALE     | G1     | Stage IIIC | T3  | M0 |
| TCGA-G3-     | 744  | 0 | 58 MALE     | G1     | Stage I    | T1  | M0 |
| TCGA-DD      | 373  | 1 | 60 MALE     | G3     | Stage II   | T2  | M0 |
| TCGA-DD      | 2301 | 0 | 68 MALE     | G1     | Stage I    | T1  | M0 |
| TCGA-G3-     | 412  | 0 | 58 FEMALE   | G2     | Stage II   | T2  | M0 |
| TCGA-ZP-     | 1088 | 1 | 59 MALE     | G1     | unknow     | T1  | MX |
| TCGA-DD      | 1531 | 0 | 53 MALE     | G3     | Stage I    | T1  | M0 |
| TCGA-DD      | 469  | 1 | 52 MALE     | G4     | Stage II   | T2  | M0 |
| TCGA-CC-     | 303  | 1 | 61 MALE     | G2     | Stage IIIA | T3  | M0 |
| TCGA-2V-A95S |      | 0 | unknow MALE | G3     | Stage II   | T2  | MX |
| TCGA-2Y-     | 1229 | 1 | 58 MALE     | G2     | Stage I    | T1  | MX |
| TCGA-DD      | 428  | 0 | 72 MALE     | G2     | Stage I    | T1  | M0 |
| TCGA-DD      | 233  | 1 | 65 MALE     | G2     | Stage IIIA | T3b | M0 |
| TCGA-KR-     | 657  | 0 | 64 MALE     | G1     | Stage I    | T1  | M0 |
| TCGA-DD      | 347  | 0 | 51 MALE     | G2     | Stage I    | T1  | M0 |
| TCGA-DD      | 2102 | 0 | 75 MALE     | G2     | Stage II   | T2  | M0 |
| TCGA-DD      | 1302 | 0 | 32 MALE     | G3     | Stage I    | T1  | M0 |
| TCGA-GJ-     | 31   | 1 | 75 FEMALE   | G2     | Stage II   | T2  | MX |
| TCGA-DD      | 664  | 0 | 45 MALE     | G3     | Stage I    | T1  | M0 |
| TCGA-DD      | 574  | 0 | 50 MALE     | G3     | Stage I    | T1  | M0 |
| TCGA-FV-     | 247  | 1 | 81 FEMALE   | G2     | Stage II   | T2  | MX |
| TCGA-BC-     | 1135 | 1 | 72 FEMALE   | unknow | unknow     | T2  | MX |
| TCGA-2Y-     | 724  | 1 | 58 MALE     | G2     | unknow     | T2  | MX |
| TCGA-ED-     | 6    | 0 | 48 FEMALE   | G3     | Stage II   | T2  | M0 |
| TCGA-DD      | 11   | 1 | 75 MALE     | G2     | Stage II   | T2  | M0 |
| TCGA-G3-     | 632  | 0 | 60 FEMALE   | G3     | Stage I    | T1  | MX |
| TCGA-KR-     | 906  | 0 | 57 MALE     | G1     | Stage I    | T1  | M0 |
| TCGA-5R-     | 337  | 0 | 17 FEMALE   | G3     | Stage IIIA | T3a | M0 |

| N  | vascular_t | child_pugf | eastern_cancer_ | oncology_group |
|----|------------|------------|-----------------|----------------|
| N0 | Micro      | A          |                 | 0              |
| N0 | None       | unknow     | unknow          |                |
| N0 | None       | unknow     |                 | 0              |
| N0 | unknow     | unknow     |                 | 2              |
| N0 | Micro      | A          |                 | 0              |
| N0 | None       | A          |                 | 0              |
| N0 | None       | A          |                 | 0              |
| N0 | unknow     | unknow     |                 | 2              |
| N0 | None       | B          |                 | 0              |
| N0 | None       | A          |                 | 0              |
| N0 | None       | A          |                 | 2              |
| N0 | None       | A          |                 | 0              |
| NX | Micro      | unknow     | unknow          |                |
| N0 | Micro      | A          |                 | 2              |
| N0 | Micro      | A          |                 | 0              |
| N0 | unknow     | A          |                 | 0              |
| N0 | None       | A          |                 | 1              |
| NX | unknow     | unknow     |                 | 0              |
| N0 | None       | B          |                 | 0              |
| N0 | Micro      | A          |                 | 0              |
| N0 | Micro      | A          |                 | 1              |
| N0 | None       | A          |                 | 0              |
| N0 | Micro      | unknow     | unknow          |                |
| NX | unknow     | unknow     | unknow          |                |
| NX | None       | A          |                 | 1              |
| NX | unknow     | unknow     |                 | 2              |
| N0 | None       | A          |                 | 0              |
| NX | None       | A          |                 | 1              |
| N0 | None       | unknow     | unknow          |                |
| N0 | None       | A          |                 | 0              |
| N0 | Micro      | A          |                 | 0              |
| N0 | None       | unknow     |                 | 1              |
| N0 | None       | unknow     | unknow          |                |
| N0 | Micro      | A          |                 | 0              |
| N0 | unknow     | unknow     |                 | 3              |
| NX | Micro      | A          |                 | 1              |
| N0 | None       | A          |                 | 0              |
| N0 | unknow     | unknow     | unknow          |                |
| N0 | unknow     | unknow     | unknow          |                |
| NX | Micro      | unknow     | unknow          |                |
| NX | None       | B          |                 | 0              |
| N0 | Micro      | unknow     | unknow          |                |
| NX | None       | A          |                 | 0              |
| N0 | unknow     | unknow     |                 | 2              |
| N0 | None       | A          |                 | 0              |
| N0 | None       | unknow     |                 | 0              |
| N0 | None       | unknow     | unknow          |                |
| NX | None       | A          |                 | 2              |
| N0 | Micro      | unknow     | unknow          |                |
| N0 | None       | A          |                 | 1              |
| N0 | None       | A          |                 | 1              |
| N0 | None       | A          |                 | 0              |
| NX | None       | unknow     | unknow          |                |
| N0 | None       | A          |                 | 0              |
| N0 | None       | A          |                 | 0              |
| N0 | unknow     | unknow     |                 | 3              |
| NX | None       | unknow     |                 | 1              |



|    |        |        |        |
|----|--------|--------|--------|
| NX | None   | unknow | 1      |
| N0 | unknow | unknow | 1      |
| N0 | None   | B      | 2      |
| NX | None   | unknow | unknow |
| N0 | Micro  | A      | 1      |
| N0 | Micro  | A      | 0      |
| N0 | unknow | unknow | unknow |
| N0 | None   | A      | 0      |
| NX | unknow | unknow | 0      |
| N0 | None   | B      | 1      |
| NX | Micro  | unknow | unknow |
| N0 | unknow | unknow | unknow |
| N0 | None   | A      | 1      |
| N0 | None   | A      | 0      |
| N0 | None   | A      | 1      |
| N0 | None   | A      | 1      |
| NX | None   | unknow | 0      |
| NX | None   | A      | 0      |
| N0 | unknow | unknow | 3      |
| N0 | None   | unknow | 0      |
| N0 | None   | A      | 0      |
| N0 | unknow | unknow | 4      |
| NX | None   | A      | 0      |
| NX | None   | A      | 0      |
| N0 | unknow | unknow | 2      |
| N0 | None   | unknow | unknow |
| N0 | None   | A      | 0      |
| NX | None   | unknow | unknow |
| N0 | None   | A      | 0      |
| N0 | None   | A      | 1      |
| N0 | Micro  | A      | 0      |
| NX | None   | A      | 0      |
| N0 | unknow | A      | unknow |
| NX | unknow | A      | 1      |
| N0 | Micro  | A      | 0      |
| NX | None   | A      | 0      |
| NX | Micro  | A      | 0      |
| N0 | None   | A      | 1      |
| NX | None   | unknow | unknow |
| N0 | None   | A      | 0      |
| N0 | unknow | unknow | 2      |
| N0 | None   | A      | 0      |
| N0 | Macro  | A      | 0      |
| NX | Micro  | A      | 1      |
| N0 | Micro  | A      | 1      |
| N0 | Micro  | unknow | unknow |
| N0 | Micro  | A      | 0      |
| NX | Micro  | unknow | unknow |
| N0 | unknow | unknow | 3      |
| N0 | None   | A      | 0      |
| N0 | None   | A      | 0      |
| NX | unknow | unknow | unknow |
| N0 | unknow | unknow | 3      |
| N0 | Micro  | A      | 0      |
| N0 | None   | unknow | 3      |
| NX | Micro  | A      | unknow |
| N0 | None   | A      | 1      |
| NX | None   | unknow | unknow |

|        |        |        |        |   |
|--------|--------|--------|--------|---|
| N0     | None   | A      |        | 0 |
| NX     | None   | unknow | unknow |   |
| NX     | Micro  | unknow | unknow |   |
| N0     | None   | A      |        | 0 |
| N0     | Macro  | unknow | unknow |   |
| N0     | Micro  | A      |        | 0 |
| N0     | None   | unknow | unknow |   |
| N0     | Micro  | A      |        | 2 |
| N0     | None   | A      |        | 0 |
| N0     | None   | unknow |        | 0 |
| NX     | unknow | A      | unknow |   |
| N0     | None   | A      |        | 1 |
| N0     | None   | A      |        | 0 |
| N0     | Micro  | unknow | unknow |   |
| N0     | Micro  | A      |        | 0 |
| N0     | None   | unknow |        | 0 |
| NX     | Micro  | unknow | unknow |   |
| N0     | None   | A      |        | 1 |
| N0     | unknow | A      |        | 1 |
| N0     | None   | A      |        | 0 |
| unknow | Micro  | A      |        | 1 |
| NX     | Micro  | unknow |        | 0 |
| NX     | None   | B      | unknow |   |
| N0     | Micro  | B      |        | 1 |
| N0     | unknow | unknow | unknow |   |
| N0     | None   | A      |        | 0 |
| NX     | None   | A      |        | 1 |
| NX     | None   | A      |        | 0 |
| NX     | Micro  | A      |        | 0 |
| N0     | None   | A      |        | 1 |
| NX     | None   | A      |        | 0 |
| N0     | None   | unknow | unknow |   |
| NX     | Micro  | A      |        | 1 |
| N1     | unknow | unknow |        | 0 |
| N0     | Micro  | A      |        | 1 |
| N0     | None   | A      |        | 0 |
| NX     | Micro  | unknow |        | 0 |
| N0     | Micro  | unknow | unknow |   |
| NX     | None   | A      |        | 1 |
| NX     | None   | A      |        | 0 |
| N0     | unknow | unknow | unknow |   |
| NX     | Micro  | A      | unknow |   |
| N0     | Micro  | B      |        | 1 |
| N0     | unknow | unknow |        | 3 |
| N0     | None   | A      |        | 0 |
| N0     | None   | A      |        | 0 |
| N0     | None   | A      |        | 1 |
| N0     | None   | A      |        | 0 |
| N0     | None   | A      |        | 1 |
| N0     | Micro  | unknow | unknow |   |
| N0     | None   | unknow |        | 0 |
| NX     | Micro  | A      |        | 1 |
| N0     | Micro  | A      |        | 0 |
| NX     | Macro  | unknow |        | 0 |
| NX     | unknow | unknow | unknow |   |
| N0     | None   | A      |        | 0 |
| N0     | None   | A      |        | 0 |
| N0     | Micro  | unknow | unknow |   |

|    |        |        |        |   |
|----|--------|--------|--------|---|
| N0 | None   | A      |        | 0 |
| N0 | Micro  | unknow | unknow |   |
| N0 | None   | A      |        | 0 |
| NX | unknow | unknow | unknow |   |
| NX | None   | A      |        | 0 |
| NX | unknow | unknow | unknow |   |
| NX | None   | A      |        | 0 |
| N0 | None   | A      |        | 0 |
| N0 | None   | A      |        | 0 |
| N0 | None   | B      |        | 2 |
| NX | None   | unknow |        | 0 |
| N0 | None   | unknow |        | 3 |
| N0 | None   | unknow |        | 0 |
| N0 | unknow | unknow |        | 4 |
| NX | None   | A      |        | 1 |
| NX | None   | A      |        | 1 |
| N0 | None   | unknow | unknow |   |
| N0 | None   | A      |        | 0 |
| N0 | Micro  | A      |        | 1 |
| NX | Micro  | A      |        | 0 |
| N0 | None   | A      |        | 0 |
| N0 | None   | A      |        | 0 |
| N0 | unknow | unknow |        | 0 |
| N0 | Micro  | A      |        | 0 |
| NX | Micro  | A      |        | 0 |
| N0 | unknow | unknow | unknow |   |
| N0 | Micro  | A      |        | 0 |
| N0 | None   | A      |        | 0 |
| N0 | unknow | unknow |        | 2 |
| N0 | None   | B      |        | 1 |
| N0 | None   | A      |        | 1 |
| N0 | Micro  | A      |        | 1 |
| N0 | None   | A      |        | 1 |
| N0 | None   | A      |        | 0 |
| NX | None   | A      |        | 0 |
| N0 | None   | A      |        | 1 |
| N0 | Macro  | A      |        | 1 |
| NX | Micro  | unknow | unknow |   |
| N0 | Micro  | unknow | unknow |   |
| NX | None   | unknow | unknow |   |
| N0 | Macro  | B      |        | 1 |
| N0 | unknow | unknow | unknow |   |
| N0 | None   | A      |        | 1 |
| N0 | None   | B      |        | 0 |
| N0 | None   | A      |        | 1 |
| N0 | None   | A      |        | 0 |
| NX | unknow | A      |        | 0 |
| N0 | Macro  | unknow | unknow |   |
| NX | Micro  | unknow | unknow |   |
| NX | Micro  | A      |        | 0 |
| NX | None   | A      |        | 0 |
| NX | Micro  | B      |        | 1 |
| NX | None   | B      |        | 0 |
| N0 | None   | A      |        | 0 |
| N0 | Micro  | unknow | unknow |   |
| NX | Micro  | A      | unknow |   |
| N0 | None   | A      |        | 0 |
| NX | None   | C      |        | 0 |

|    |        |        |        |   |
|----|--------|--------|--------|---|
| N0 | None   | A      |        | 1 |
| N0 | None   | A      |        | 0 |
| N0 | Micro  | A      |        | 1 |
| NX | None   | unknow | unknow |   |
| NX | unknow | unknow |        | 2 |
| N0 | None   | A      |        | 0 |
| N0 | None   | unknow | unknow |   |
| NX | Micro  | A      |        | 0 |
| N0 | None   | A      |        | 0 |
| N0 | None   | A      |        | 0 |
| N0 | Micro  | unknow | unknow |   |
| N0 | None   | A      |        | 0 |
| N0 | Micro  | A      |        | 1 |
| N0 | Micro  | A      |        | 0 |
| N0 | Macro  | A      |        | 0 |
| NX | None   | A      |        | 1 |
| N0 | unknow | unknow |        | 3 |
| NX | None   | A      |        | 0 |
| N0 | Macro  | A      |        | 0 |
| N0 | None   | A      |        | 0 |
| N0 | None   | A      |        | 0 |
| N0 | None   | A      |        | 0 |
| NX | unknow | unknow |        | 0 |
| N0 | Micro  | unknow |        | 1 |
| N0 | Macro  | unknow |        | 0 |
| NX | unknow | A      |        | 0 |
| NX | None   | A      |        | 1 |
| NX | None   | B      |        | 2 |
| N0 | None   | A      |        | 0 |
| N0 | None   | A      |        | 2 |
| N1 | None   | B      |        | 2 |
| NX | Micro  | A      |        | 1 |
| N0 | unknow | unknow |        | 2 |
| N0 | None   | A      |        | 0 |
| N0 | Micro  | A      |        | 0 |
| N0 | None   | A      |        | 0 |
| NX | None   | unknow | unknow |   |
| N0 | Micro  | A      |        | 1 |
| N0 | None   | A      |        | 1 |
| N0 | Micro  | A      |        | 0 |
| NX | Micro  | A      |        | 0 |
| NX | None   | A      |        | 1 |
| NX | Macro  | A      |        | 0 |
| N0 | None   | A      |        | 0 |
| N0 | unknow | unknow |        | 2 |
| N0 | None   | A      |        | 1 |
| NX | None   | unknow | unknow |   |
| N0 | None   | A      |        | 0 |
| N0 | None   | A      |        | 0 |
| NX | Micro  | A      |        | 0 |
| N0 | Micro  | unknow | unknow |   |
| N0 | None   | A      |        | 0 |
| N0 | None   | A      |        | 1 |
| NX | Macro  | A      |        | 0 |
| N0 | Micro  | unknow | unknow |   |
| N0 | Micro  | unknow | unknow |   |
| N0 | None   | A      |        | 0 |
| NX | unknow | unknow | unknow |   |

|    |        |        |        |   |
|----|--------|--------|--------|---|
| N0 | None   | unknow | unknow |   |
| NX | None   | unknow | unknow |   |
| N0 | Micro  | A      |        | 0 |
| NX | Micro  | unknow | unknow |   |
| N0 | None   | A      |        | 1 |
| N0 | None   | A      |        | 1 |
| NX | None   | unknow | unknow |   |
| N0 | None   | unknow |        | 1 |
| N0 | Micro  | A      |        | 0 |
| NX | None   | unknow |        | 1 |
| N0 | None   | B      |        | 0 |
| N0 | Micro  | A      |        | 0 |
| N0 | None   | A      |        | 0 |
| N0 | None   | A      |        | 1 |
| N0 | None   | A      |        | 1 |
| N0 | None   | A      |        | 1 |
| NX | Macro  | A      |        | 2 |
| NX | None   | unknow |        | 0 |
| NX | Micro  | unknow |        | 2 |
| NX | None   | unknow | unknow |   |
| N0 | None   | unknow | unknow |   |
| NX | None   | B      | unknow |   |
| N0 | None   | A      |        | 0 |
| N0 | None   | A      |        | 0 |
| NX | None   | A      |        | 1 |
| N0 | None   | A      |        | 1 |
| N0 | Macro  | A      |        | 1 |
| N0 | None   | A      |        | 1 |
| NX | unknow | unknow |        | 2 |
| N0 | Micro  | A      |        | 1 |
| N1 | None   | A      | unknow |   |
| N0 | None   | A      |        | 0 |
| N0 | Micro  | A      |        | 0 |
| N0 | None   | A      |        | 0 |
| N0 | unknow | unknow |        | 3 |
| N0 | None   | A      |        | 0 |
| N0 | Macro  | A      |        | 0 |
| NX | None   | A      |        | 1 |
| N0 | Micro  | A      |        | 0 |
| NX | None   | unknow | unknow |   |
| N0 | None   | A      |        | 0 |
| N0 | None   | A      |        | 1 |
| N0 | None   | unknow | unknow |   |
| N0 | None   | A      |        | 0 |
| N0 | None   | A      |        | 0 |
| N0 | Micro  | unknow |        | 2 |
| N0 | unknow | unknow |        | 2 |
| N0 | None   | A      |        | 0 |
| N0 | None   | unknow |        | 1 |
| NX | unknow | unknow |        | 1 |
| N0 | None   | A      |        | 0 |
| N0 | None   | unknow | unknow |   |
| N0 | Macro  | B      |        | 1 |
| NX | None   | A      | unknow |   |
| NX | None   | A      |        | 0 |
| N0 | None   | B      |        | 2 |
| N0 | Micro  | A      |        | 0 |
| NX | None   | A      |        | 1 |

|    |        |        |        |   |
|----|--------|--------|--------|---|
| N0 | None   | A      |        | 1 |
| NX | unknow | unknow | unknow |   |
| N1 | unknow | unknow |        | 3 |
| NX | unknow | A      |        | 0 |
| N0 | Macro  | A      |        | 0 |
| N0 | None   | A      |        | 1 |
| N0 | None   | A      |        | 1 |
| NX | None   | A      |        | 1 |
| N0 | Micro  | A      |        | 0 |
| N0 | Micro  | A      |        | 0 |
| N0 | unknow | unknow |        | 3 |
| NX | Micro  | A      |        | 4 |
| NX | unknow | unknow |        | 1 |
| N0 | None   | A      |        | 0 |
| N0 | Macro  | A      |        | 0 |
| N0 | None   | unknow | unknow |   |
| N0 | None   | A      |        | 0 |
| N0 | Micro  | A      |        | 2 |
| N0 | None   | A      |        | 0 |
| NX | Micro  | unknow | unknow |   |
| N0 | None   | A      |        | 0 |
| N0 | None   | A      |        | 0 |
| N0 | Micro  | unknow | unknow |   |
| NX | None   | unknow | unknow |   |
| NX | unknow | unknow | unknow |   |
| NX | Micro  | unknow | unknow |   |
| N0 | None   | A      |        | 1 |
| NX | None   | A      |        | 0 |
| N0 | None   | unknow | unknow |   |
| N0 | Micro  | B      |        | 1 |
