# Supplementary material for: Construction of a novel immune-related lncRNA signature and its potential to predict the immune status of patients with hepatocellular carcinoma
Source: Springer Nature journal article supplement (doi:10.1186/s12885-021-09059-x), 2021-12-01
Supplement: MOESM4 [file 19968004]

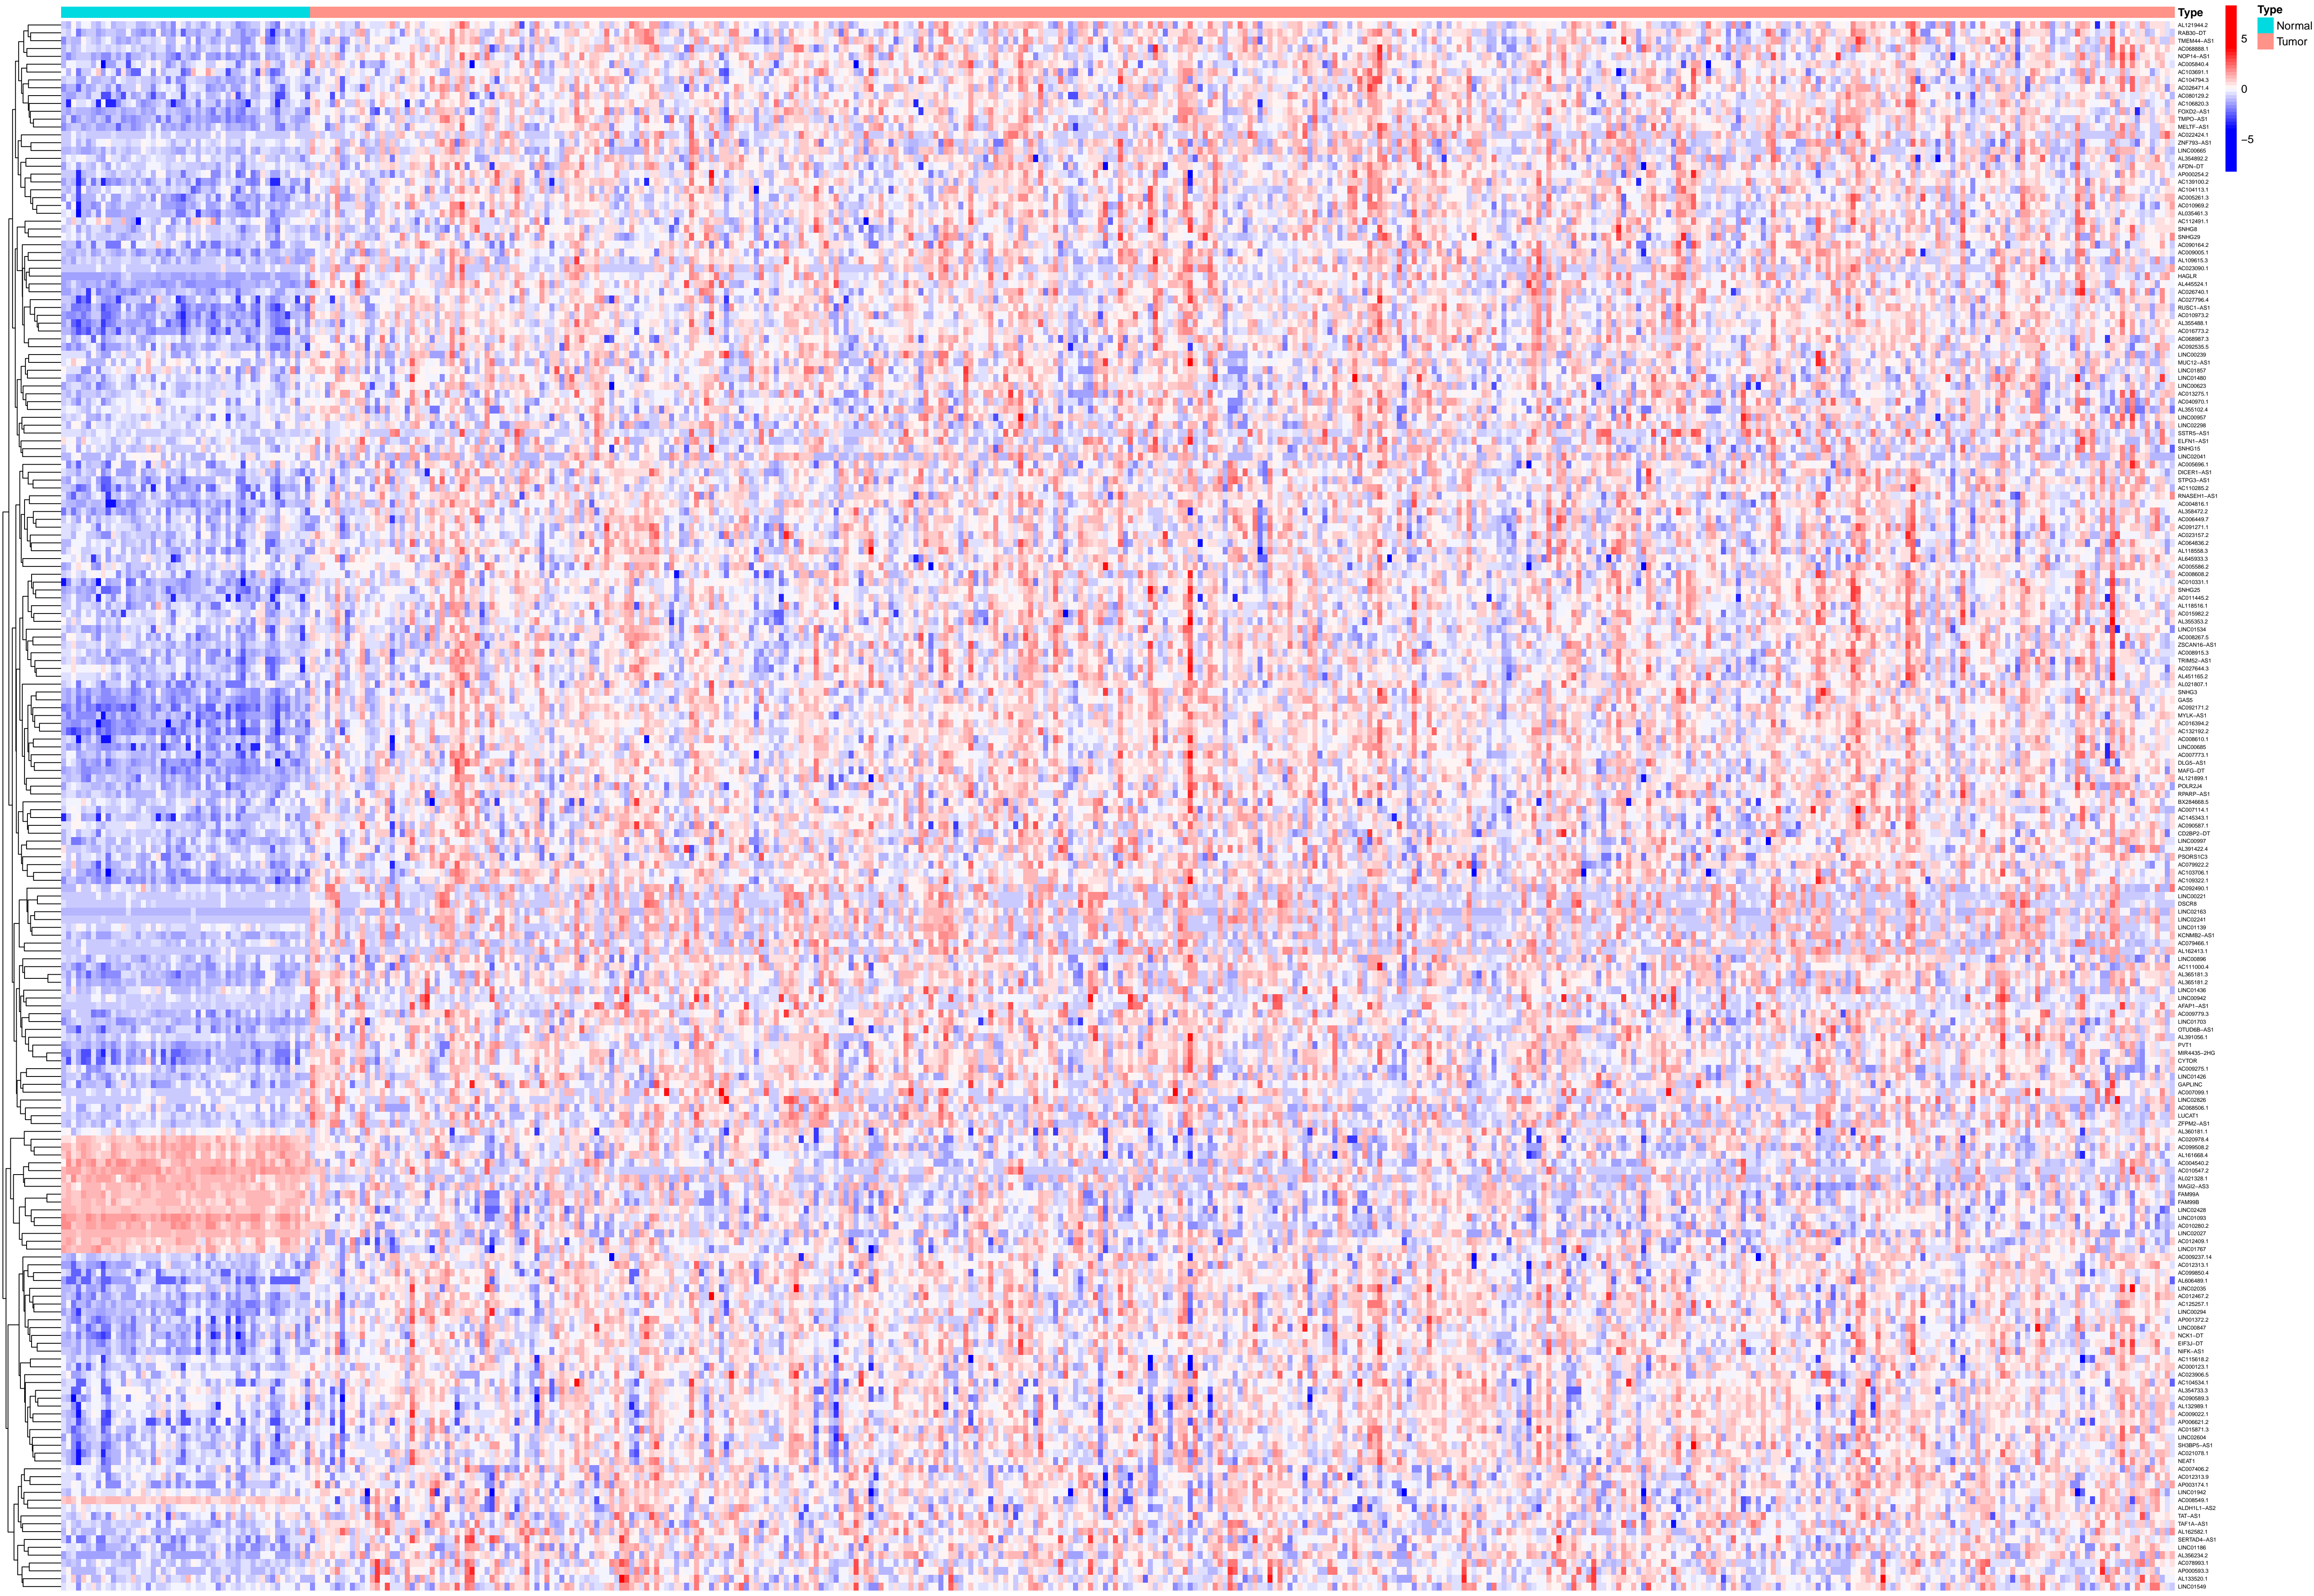

Type  
5  
0  
-5  
Normal  
Tumor

AL121842.2  
RAB30-DT  
TMEM44-AS1  
AC088881.1  
NOP14-AS1  
AC005840.4  
AC123811.1  
AC104784.3  
AC026471.4  
AC091231.2  
AC106820.3  
FMO3-AS1  
TMPO-AS1  
MEI3T-AS1  
AC028241.1  
ZNF793-AS1  
LINC00665  
AL354892.2  
AFDN-DT  
AP00254.2  
AC121101.2  
AC104113.1  
AC026281.3  
AC010662.2  
AL355481.3  
AC112481.1  
SNHG8  
SNHG29  
AC091654.2  
AC090905.1  
AL109615.3  
AC023951.1  
HAGLR  
AL445241.1  
AC026745.1  
AC027798.4  
RUB3-AS1  
AC010973.2  
AL355481.1  
AC018773.2  
AC088967.3  
AC025255.5  
LINC02239  
MUC12-AS1  
LINC01857  
LINC01460  
LINC00623  
AC013275.1  
AC049751.1  
AL355100.4  
LINC02097  
LINC02258  
SFRP5-AS1  
SFRP5-AS1  
SNHG15  
LINC02041  
AC026961.1  
DICER1-AS1  
STPQ3-AS1  
AC112028.2  
RNA5H1-AS1  
AC024811.1  
AL358472.2  
AC064447.7  
AC081271.1  
AC023157.2  
AC084936.2  
AL115506.3  
AL645933.3  
AC025086.2  
AC028608.2  
AC010311.1  
SNHG25  
AC011445.2  
AL118161.1  
AC010952.2  
AL355353.2  
LINC01534  
AC026115.5  
ZSCAN16-AS1  
AC008915.3  
TMEM2-AS1  
AC027644.3  
AL601182.2  
AL021807.1  
SNHG3  
GAS1  
AC092171.2  
MYLK-AS1  
AC018384.2  
AC132192.2  
AC008010.1  
LINC02095  
AC027773.1  
DLG5-AS1  
MARS2-DT  
AL121899.1  
PCOLCE  
RPRRP-AS1  
BX264685.5  
AC021141.1  
AC145343.1  
AC058587.1  
CTDSPF-DT  
LINC00987  
AL391422.4  
AC028163.3  
AC079622.2  
AC118781.1  
AC109322.1  
AC024901.1  
LINC02021  
DSCR8  
LINC02163  
LINC02241  
LINC01139  
KCNMB2-AS1  
AC019461.1  
AL162413.1  
LINC00896  
AC111000.4  
AL365181.3  
AL365181.2  
LINC01436  
LINC00942  
SFRP1-AS1  
AC09779.3  
LINC01703  
CTD126B-AS1  
AL391056.1  
PVT1  
MIR435-2HG  
CYTOR  
AC092875.1  
LINC01426  
GAPLINC  
AC070981.1  
LINC02826  
AC088506.1  
LICRT  
ZFP42-AS1  
AL360181.1  
AC029714.4  
AC099508.2  
AL116818.4  
AC044562.2  
AC010547.2  
AL021228.1  
MAGI2-AS3  
FAM98A  
FAM98B  
LINC02428  
LINC01093  
AC010362.2  
LINC02027  
AC012401.1  
LINC01767  
AC099237.14  
AC012111.1  
AC099850.4  
AL066481.1  
LINC02095  
AC012467.2  
AC125257.1  
LINC02094  
AP001372.2  
LINC00847  
NCK1-DT  
EIF3J-DT  
MIR4-AS1  
AC115618.2  
AC001231.1  
AC029385.5  
AC104534.1  
AL354733.3  
AC026563.3  
AL132989.1  
AC099221.1  
AP00821.2  
AC015871.3  
LINC02094  
SH3BP5-AS1  
NEAT1  
AC021078.1  
NEAT1  
AC007406.2  
AC012313.9  
AP001714.1  
LINC01942  
AC088461.1  
ALPH1L4-AS2  
TAT-AS1  
TAP1A-AS1  
AL116265.1  
SERPINA4-AS1  
LINC01186  
AL356234.2  
AC078993.1  
AP005553.3  
AL133520.1  
LINC01549
